# Supplementary material for: Ensemble Forecasts of Air Quality in Eastern China – Part 2. Evaluation of the MarcoPolo-Panda Prediction System, Version 1
Source: Copernicus journal article supplement (doi:10.5194/gmd-2018-234), 2018-10-01
Supplement: Supplementary file [file gmd-2018-234-AC2-supplement.pdf]

# Ensemble Forecasts of Air Quality in Eastern China

## Part 2. Evaluation of the MarcoPolo-Panda Prediction System, Version 1.

Anna Katinka Petersen<sup>1</sup>, Guy P Brasseur<sup>1,2</sup>, Idir Bouarar<sup>1</sup>, Johannes Flemming<sup>3</sup>, Michael Gauss<sup>4</sup>, Fei Jiang<sup>5</sup>, Rostislav Kouznetsov<sup>6</sup>, Richard Kranenburg<sup>7</sup>, Bas Mijling<sup>8</sup>, Vincent-Henri Peuch<sup>3</sup>, Matthieu Pommier<sup>4</sup>, Arjo Segers<sup>7</sup>, Mikhail Sofiev<sup>6</sup>, Renske Timmermans<sup>7</sup>, Ronald van der A<sup>8,9</sup>, Stacy Walters<sup>2</sup>, Ying Xie<sup>10</sup>, Jianming Xu<sup>10</sup>, Guangqiang Zhou<sup>10</sup>

<sup>1</sup> Max Planck Institute for Meteorology, Hamburg, Germany

<sup>2</sup> National Center for Atmospheric Research, Boulder, CO, USA

<sup>3</sup> European Centre for Middle Range Weather Forecasts, Reading, UK.

<sup>4</sup> Norwegian Meteorological Institute, Oslo, Norway

<sup>5</sup> Nanjing University, Nanjing, China

<sup>6</sup> Finnish Meteorological Institute, Helsinki, Finland.

<sup>7</sup> TNO, Utrecht, The Netherlands

<sup>8</sup> Royal Netherlands Meteorological Institute (KNMI), De Bilt, The Netherlands

<sup>9</sup> Nanjing University of Information Science and Technology, Nanjing, China

<sup>10</sup> Shanghai Meteorological Service, Shanghai, China

19

### Abstract:

An operational multi-model forecasting system for air quality has been developed to provide air quality services for urban areas of China. The initial forecasting system included seven state-of-the-art computational models developed and executed in Europe and China (CHIMERE, IFS, EMEP MSC-W, WRF-Chem-MPIM, WRF-Chem-SMS, LOTOS-EUROS and SILAMtest). Several other models joined the prediction system recently, but are not considered in the present analysis. In addition to the individual models, a simple multi-model ensemble was constructed by deriving statistical quantities such as the median and the mean of the predicted concentrations.

28

The prediction system provides daily forecasts and observational data of surface ozone, nitrogen dioxides and particulate matter for the 37 largest urban agglomerations in China (population higher than 3 million in 2010). These individual forecasts as well as the multi-model ensemble predictions for the next 72 hours are displayed as hourly outputs on a publicly accessible web site ([www.marcopolo-panda.eu](http://www.marcopolo-panda.eu)).

34

In this paper, the performance of the predictions system (individual models and the multi-model ensemble) for the first operational year (April 2016 until June 2017) has been analysed through statistical indicators using the surface observational data reported at Chinese national monitoring stations. This evaluation aims to investigate a) the seasonal behavior, b) the geographical distribution and c) diurnal variations of the ensemble and model skills. Statistical indicators show that the ensemble product usually provides the best performance compared to the individual model forecasts. The ensemble product is robust even if occasionally some individual model results are missing.

43

Overall and in spite of some discrepancies, the air quality forecasting system is well suited for the prediction of air pollution events and has the ability to provide alert warning (binary prediction) of air pollution events if bias corrections are applied to improve the ozone predictions.

## 471. Introduction

48  
49 With the rapid development of its economy, China has been experiencing repeated intense air  
50 pollution episodes (e.g. *Guo et al., 2014, Huang et al., 2014, Wang et al., 2014*) with a wide range  
51 of health effects (*Kampa and Castanas 2008; Wu et al., 2012; Hamra et al. 2015; Boynard et al.,*  
52 *2014; WHO, 2018*) and serious consequences on ecosystems (*Fowler et al., 2008, Ashmore, 2005;*  
53 *Leisner et al., 2012; Sinha et al., 2015*) and on climate (*Sitch et al. 2007; Brasseur et al., 1999;*  
54 *Akimoto, 2003*). High concentrations of particulate matter often cover a large area of eastern China  
55 during winter when air remains stagnant for several days and chemical compounds emitted by  
56 power plants, industrial complexes, traffic and domestic infrastructures remain trapped near the  
57 surface (e.g. *Wang et al., 2014; Zhao et al., 2013*). During summer, photochemical processes  
58 convert nitrogen oxides ( $\text{NO}_x$ ) and volatile organic compounds (VOCs) into tropospheric ozone  
59 ( $\text{O}_3$ ) (e.g. *Xu et al., 2008, Sun et al., 2016*).

60  
61 Long-term solutions to mitigate air pollution require a fundamental transformation of the energy  
62 system, which may require decades to be fully implemented. Short-term actions to avoid severe air  
63 pollution episodes, however, can be put in place immediately if such episodes can be reliably  
64 predicted a few days prior to their occurrence. Comprehensive air quality models that capture  
65 meteorological, chemical and physical processes in the troposphere and predict the fate of air  
66 pollutants are key tools to forecast the likelihood of air pollution episodes and hence to inform the  
67 authorities.

68  
69 Within the EU projects MarcoPolo and Panda, that include European as well as Chinese partner  
70 organizations, an operational multi-model forecasting system for air quality including a number of  
71 different chemical transport models has been developed, and is providing daily forecasts of ozone,  
72 nitrogen oxides, and particulate matter for the 37 largest urban areas of China (population higher  
73 than 3 million in 2010). These individual forecasts as well as the mean and median concentrations  
74 for the next 3 days are posted on a dedicated website ([www.marcopolo-panda.eu/forecast](http://www.marcopolo-panda.eu/forecast)) together  
75 with the hourly observational data from local measurements reported by the Chinese monitoring  
76 network of the China National Environmental Monitoring Centre (CNEMC) (data available at  
77 [www.pm25.in](http://www.pm25.in)). This operational air quality analysis and forecasting system is presented in detail in  
78 a companion paper (*Brasseur et al, 2018*), where the individual models contributing to the  
79 MarcoPolo-Panda prediction system are described, and details about the individual models and their  
80 individual settings are provided. Information about selected parametrization options for the physical  
81 processes, including boundary layer, radiation, convection and surface processes, and about the  
82 emissions adopted in MarcoPolo-Panda prediction system are also provided.

83  
84 In the present study, we evaluate the prediction system of the MarcoPolo and Panda projects that  
85 have been in operation for more than one year. We concentrate on the period April 2016 to June  
86 2017 and analyse the model forecasts (7 individual models and the ensemble median) and  
87 observational data for 34 cities (covered by most of the models, depending on the extent of the  
88 domains, for two models only 31 and 32 cities).

89  
90 We evaluate the performance of the individual models involved in the present study, and to examine  
91 the performance of the overall forecasting system by comparing the predicted surface  
92 concentrations to values reported by the Chinese air pollution monitoring network. Section 2 of the  
93 paper provides a brief description of the forecasting system, while Section 3 investigates the  
94 performance of the system using different statistical indicators including the mean bias (BIAS), the  
95 root mean square error (RMSE), the modified normalised bias (MNBIAS), the fractional gross error

96(FGE) and the correlation coefficient. We derive in particular (a) statistical indicators for each  
97model over the time of the year (on a monthly basis) in order to analyse seasonal characteristics, (b)  
98the geographical distribution of the statistical indicators for the ensemble median in order to derive  
99regional characteristics and issues, (c) the statistical indicators of all models and of the ensemble  
100median over the time of the day (considering all model-observation pairs of all cities and for the  
101whole time period) and for a specific city (Beijing) together with the diurnal variation of the  
102pollutants during the whole time period. In Section 4, we assess the impacts of missing forecasts  
103from one or more models on the production of the ensemble. As the prediction system intends to  
104provide warning of air pollution episodes to the general public, the system performance has been  
105evaluated regarding its ability to predict the exceedence of air quality thresholds (binary prediction  
106of pollution events). This analysis is presented in Section 5. We conclude with a summary and  
107outlook in Section 6.

108

109

## 1102. Description of the Analysis and Forecasting System

111Within the EU projects MarcoPolo and Panda, a number of chemistry transport models have been  
112applied to provide daily air quality forecasts for a selection of 37 large Chinese agglomerations  
113(population over 3 million, 2010 census). Initially, seven models, CHIMERE (Royal Netherlands  
114Meteorological Institute (KNMI)), IFS (European Centre for Medium Range Weather Forecast  
115(ECMWF)), WRF-chem-SMS (Shanghai Meteorological Service (SMS)), SILAMtest (Finish  
116Meteorological Institute (FMI)), WRF-chem-MPIM (Max Planck Institute for Meteorology  
117(MPIM) in Hamburg), EMEP MSC-W (hereafter referred to as 'EMEP', Norwegian Meteorological  
118Institute (MET Norway)) and LOTOS-EUROS (The Netherlands Organisation for Applied  
119Scientific Research (TNO)) were providing daily forecasts every day at 0:00 UTC for the next 72  
120hours (three days) for NO<sub>2</sub>, O<sub>3</sub>, PM<sub>10</sub> and PM<sub>2.5</sub> (see Figure 1). WRF-CMAQ and WRMS-CMAQ,  
121both used by Chinese institutions (Nanjing University and SMS), have joined recently the  
122prediction system, but are not considered in the present analysis.

123

124We should note that the models considered in the present study may have significantly evolved  
125since the present analysis was performed. This is the case, for example, of the SILAM model  
126developed by the Finish Meteorological Institute, whose configuration was still in a test mode, and  
127is therefore referred to as SILAMtest. Several of the models considered here have been involved in  
128a previous intercomparison summarized by Bessagnet et al. (2016).

129

130The individual models are executed independently on the computing systems available in each  
131partner institution. The surface concentrations of the key chemical species are extracted locally  
132from the model outputs and forwarded to a central database operated by the Royal Netherlands  
133Meteorological Institute (KNMI).

134

135Hourly predictions of surface concentrations (expressed in  $\mu\text{g}/\text{m}^3$ ), are provided by the models as  
136grid values, which are bi-linearly interpolated to city center coordinates. The average for the data  
137provided by the urban network (usually around 5-12 stations), is posted together with the  
138corresponding standard deviation and the number of contributing stations. In the present analysis,  
139we consider only the model simulations corresponding to 34 cities, since the cities of Ürümqi (most  
140western, only covered by three models), Changchun and Harbin (most northern cities), are located  
141outside of the domains covered by most individual models, which are indicated in the companion  
142paper (*Brasseur et al., 2018*).

143

In addition to the forecasts provided by the individual participating models, a multi-model ensemble was constructed from which the median and the mean were derived. To process the ensemble median, all seven individual models are first interpolated to a common horizontal grid. For each grid point, the ensemble model is calculated as the median value of the individual model forecasts. The median is relatively insensitive to outliers in the forecasts. The method is also less vulnerable to occasionally missing data from individual models, as the minimum number of model results needed to calculate a meaningful ensemble mean or median is almost always available. This will be discussed in detail in Section 4. The multi-model approach also provides more accurate forecasts and thus reduces the underlying uncertainties (as will be shown in the following section). More advanced methods, e.g. based on individual model skills, are discussed in the literature (e.g. Galmarini et al, 2013). They are significantly more costly from a computational point of view and therefore not well suited for daily operations.

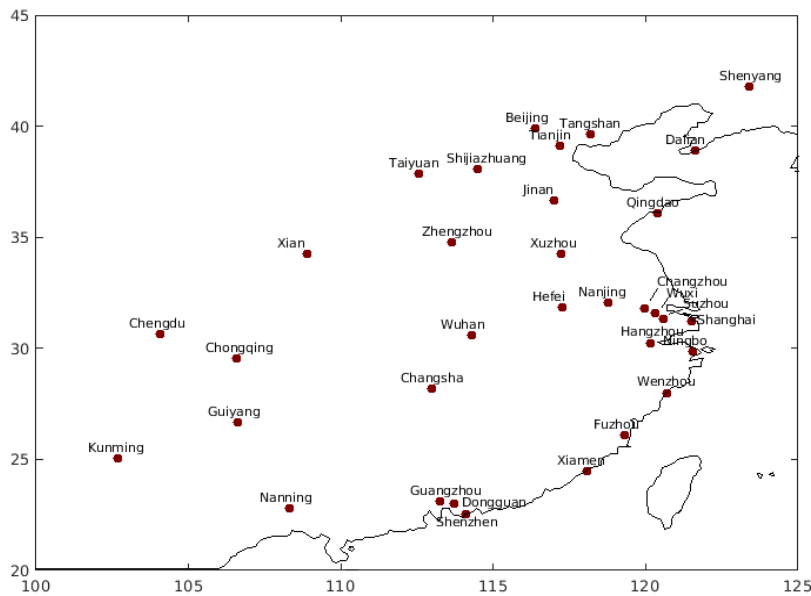

Figure 1: Map of the 34 cities/urban clusters (population over 3 million (2010 census)) with available data (observational and model ensembles), used in this evaluation.

### 3. Evaluation of the performance of the system

The evaluation of the performance of a forecasting system is a necessary step for assessing the quality of the predictions and demonstrating its usefulness. It also provides important information that can lead to the improvement of the forecasting system and to further model development. The comparison between model output and in situ measurements is not straightforward because of the different nature of the respective quantities: air quality models provide volume averaged quantities over each model grid cell and time averages over the modeling time step. Observations are available at fixed measurement sites and at a fixed time. Further, they are influenced by local processes that are not necessarily well captured by relatively coarse resolution models. Thus, the representativeness of the observational site is not always guaranteed.

The MarcoPolo-Panda forecasting and analysis system uses the surface observations available at the web site [www.pm25.in](http://www.pm25.in) for 37 Chinese cities. For a given city, the observational data considered for the evaluation of the model consist of an average of the measurements made at the different stations of the urban network, usually 5 – 12 stations, which are aggregated to one value for the whole city. The model fields are bilinearly interpolated to the city center coordinates.

174  
175The mean bias  
176

177 
$$BIAS = \frac{1}{N} \sum_i (m_i - o_i),$$

178  
179where  $m_i$  and  $o_i$  are the model forecast value and the observation value, and  $N$  the number of model-  
180observation pairs, the root mean square error  
181

182 
$$RMSE = \sqrt{\frac{1}{N} \sum_i (m_i - o_i)^2},$$

183  
184the modified normalized bias  
185

186 
$$MNBIAS = \frac{2}{N} \sum_i \frac{(m_i - o_i)}{(m_i + o_i)},$$

187  
188the fractional gross error  
189

190 
$$FGE = \frac{2}{N} \sum_i \left| \frac{m_i - o_i}{m_i + o_i} \right|$$

191  
192and the correlation coefficient between the model forecast and observed values  
193

194 
$$R = \frac{\frac{1}{N} \sum_i (m_i - \bar{m})(o_i - \bar{o})}{\sigma_m \sigma_o}$$

195  
196are used to measure the system performance. Here  $\bar{m}$  and  $\bar{o}$  are the mean values of the model  
197forecast and observed values, and  $\sigma_m$  and  $\sigma_o$  are the corresponding standard deviations.  
198

199The evaluation presented here aims to investigate a) the statistical indicators for each model over  
200the time of the year (on a monthly basis) so that the seasonal features can be characterized and  
201related issues of individual models can be identified (Section 3.1); b) the geographical distribution  
202of the statistical indicators of the ensemble median to highlight regional characteristics and related  
203issues (Section 3.2); c) statistical indicators of all models and the ensemble median over the time of  
204the day (considering all model-observation pairs of all cities and for the whole time period) and for  
205a specific city (Beijing) together with the diurnal variation of the pollution species over the whole  
206time period (Section 3.3).

207  
208

### 2093.1 Evaluation of the Seasonal Behavior of the Models

210  
211We start our evaluation of the multi-model prediction system by examining the seasonal behavior of  
212the predicted concentrations of key chemical species. The statistical indicators mentioned above  
213have been calculated separately for each month from April 2016 to June 2017 and for the entire  
214period during which the forecasting system was operational. Due to storage issues, only the

215 predictions for the first 24 hours (0-23h) were saved while the predictions from 24h-72h were not  
216 retained and not analyzed in this work.

217

218

219 Figure 2 shows the RMSE, BIAS, MNBIAS and FGE of NO<sub>2</sub> (left panel) and O<sub>3</sub> (right panel) for  
220 each of the seven individual models included in the system and for the model ensemble median, for  
221 each individual month between April 2016 and June 2017. The same results are also provided for  
222 the whole period (“all”). It can be seen, that there is a wide spread of the results produced by the  
223 seven models. The individual models are continuously improving during the first months because  
224 many changes have been applied by the different modeling groups in order to improve their  
225 individual predictions. In the case of NO<sub>2</sub>, most individual models slightly overestimate the  
226 concentrations compared to observations. In the EMEP model, it may be explained by the larger  
227 nitrogen emissions used in comparison with the other models (Brasseur et al., 2018). This results in  
228 a positive BIAS and MNBIAS for most models and the ensemble median. The RMSE of the model  
229 ensemble is highest in July/August/September 2016 and remains relatively constant after October  
230 2016. It can be seen, that the median of the model ensemble has the lowest RMSE for NO<sub>2</sub>, the  
231 smallest BIAS and MNBIAS (slightly positive) and the lowest FGE. This demonstrates the  
232 advantage of adopting a model ensemble rather than the prediction provided by individual models.

233

234 Most models underestimate O<sub>3</sub> (likely as a result of the overestimated NO<sub>2</sub> because the O<sub>3</sub>  
235 production is not NO<sub>x</sub>-limited) during the whole period under consideration. For O<sub>3</sub>, the CHIMERE  
236 model shows slightly better performance (lowest RMSE) than the model ensemble median. The  
237 median BIAS for O<sub>3</sub> is relatively constant (slightly negative). For this particular species, the model  
238 ensemble median does not provide the best results regarding the BIAS. In fact, in this case, the  
239 model LOTOS-EUROS gives the best performance for ozone. Interestingly, this particular model  
240 has the largest negative BIAS for NO<sub>2</sub>. The median BIAS of O<sub>3</sub> remains relatively constant during  
241 the period, while the MNBIAS exhibits higher negative values during the winter months, as a result  
242 of the relative low O<sub>3</sub> concentrations during winter time.

243

244 As stated above, the MarcoPolo-Panda prediction system has the tendency to overestimate surface  
245 NO<sub>2</sub>, which leads to O<sub>3</sub> titration especially during night time. The emission injection height is also a  
246 relevant factor here since it can largely influence the results in the planetary boundary layer. During  
247 night-time, emissions from stacks may be take place above the mixing layer and explain model-data  
248 discrepancies since the models often assume that the injection of primary pollutants takes place in  
249 the first layer above the surface.

250

251 Anthropogenic emissions of primary pollutants are changing extremely rapidly in China. The  
252 adopted emissions inventories usually reflect to the situation a few years before the period during  
253 which the model simulations were performed. Since the recent NO<sub>x</sub> emissions have decreased  
254 significantly in some urban areas of China in response to measures taken by the local authorities (F.  
255 Liu et al., 2017), the anthropogenic emissions used for the current forecasts may be overestimated  
256 in some areas. Some models use reduced NO<sub>x</sub> and SO<sub>x</sub> anthropogenic emissions (for details see  
257 Brasseur et al., 2018), however, daytime concentrations of ozone are generally underestimated in  
258 most models, even when the level of NO<sub>2</sub> is in reasonable agreement with the observational values.  
259 The discrepancy could be caused by an underestimation of the emissions of some VOCs, especially  
260 in the center of urban areas where ozone is often VOC-limited.

261

262 For PM<sub>10</sub> and PM<sub>2.5</sub>, the model ensemble median shows the best performance compared to all  
263 individual models during the time period under consideration (see Figure 3). For PM<sub>10</sub>, there is an  
264 overall slight underestimation by all models except by CHIMERE and hence, by the median of the



model ensemble. For PM<sub>2.5</sub>, the BIAS is relatively constant (apart in the WRF-Chem-SMS model which exhibits a lot of variation in the BIAS of PM<sub>10</sub> and PM<sub>2.5</sub>). In this case, the BIAS is slightly overestimated, but close to zero.

Figure 4 shows the temporal correlation coefficients for NO<sub>2</sub>, O<sub>3</sub>, PM<sub>10</sub> and PM<sub>2.5</sub> for each individual month, and for the whole time period. It can be seen, that there is a wide spread between the individual models: the calculated correlations range from 0.2 to 0.7 for NO<sub>2</sub>, PM<sub>10</sub> and PM<sub>2.5</sub> and from 0.3 to 0.8 for O<sub>3</sub>. The model ensemble median and CHIMERE are characterized by high correlation coefficients in the case of NO<sub>2</sub>, O<sub>3</sub> and PM<sub>2.5</sub>. For PM<sub>10</sub>, the model ensemble median and the LOTOS-EUROS model provide the highest correlation coefficients. In general, the model ensemble median gives the best performance.

The correlation coefficient of O<sub>3</sub> for the ensemble median remains relatively unchanged during the whole time period, and ranges between 0.6 and 0.8. Considering the whole time period, it is of the order of 0.75, with CHIMERE providing a slightly higher correlation coefficient for the whole time period, and also for each individual months. All models exhibit low correlation coefficients in March 2017. High correlation coefficients are found during the early summer months (June/July). For PM<sub>10</sub> and PM<sub>2.5</sub> the correlation coefficients exhibit more variability, starting with very low correlation for all models and for the ensemble during April and May 2016, high correlation from June 2016 to March 2017, and again low correlation during April and May 2017. These differences may be due to missing sources of biomass burning or dust or to individual model tunings. An important difference between the models included in the ensemble is the formulation of dust mobilization (see Table 3 of the companion paper by Brasseur et al., 2018). Note that the CHIMERE and EMEP models do not include dust in their calculation of particulate matter and that the emissions provided by the IFS-ECMWF are substantially higher than in other models. For the entire time period, the correlation coefficient of the ensemble mean is higher than for each individual models (~0.58 for PM<sub>10</sub> and ~0.78 for PM<sub>2.5</sub>). The correlation between the model ensemble and the observations is therefore relatively satisfactory.

### 3.2 Evaluation of the Geographical Distribution

The statistical indicators, described above for all contributing cities, have also been calculated for the individual cities. The purpose here is to assess regional characteristics and to identify model issues. Figure 5 shows the statistical indicators (RMSE, BIAS and correlation coefficient) for O<sub>3</sub>, NO<sub>2</sub> and PM<sub>2.5</sub> of the Ensemble Median for each city during the time period under consideration (April 2016 until June 2017). In the upper most left panel, the BIAS of ozone for each city is shown. It can be seen, that the ensemble median is underestimating the ozone concentrations in the north and northeastern regions of China, while no significant bias compared to the observations is found in cities in the southern part of the country. RMSE in the northern/northeastern cities are higher (around 40  $\mu\text{g m}^{-3}$ ) than in southern and western cities (around 20-30  $\mu\text{g m}^{-3}$ ).

The temporal correlation coefficients for ozone calculated for each city over the whole period under consideration are slightly higher in the northern part of the country and slightly smaller in the southern regions. This indicates that the day-to-day variability is well simulated, even though the models are slightly underestimating the ozone pollution in the north. NO<sub>2</sub> concentrations (see the middle panels of Figure 5) are overestimated in some cities and underestimated in other cities. There is, however, no systematic geographical characterization of the bias. When considering individual cities, it can be seen that the NO<sub>2</sub> concentrations are slightly overestimated in most urban areas including Beijing, Shanghai, Chengdu, Wuhan and Changsha. The missing urban parameterization could be one of the reason due to less vertical mixing in the model. The RMSE for

NO<sub>2</sub> in the middle panel of Figure 5 is very uniform (around 20 µg m<sup>-3</sup>) in the whole country. The correlation coefficients of NO<sub>2</sub> (between 0.5 and 0.7) are smaller than those of O<sub>3</sub>, as NO<sub>2</sub> exhibits more temporal variability than O<sub>3</sub>. In the case of PM<sub>2.5</sub>, (see upper most right panel), the concentrations are well simulated in the northern and southern parts of China, but there are a few city clusters in the middle of the domain (Chengdu, Chongqing, Wuhan and Changsha) in which the PM<sub>2.5</sub> concentrations are overestimated by more than 50 µg m<sup>-3</sup>. These cities also show an overestimation of NO<sub>2</sub> concentrations. The overestimation of PM<sub>2.5</sub> may therefore be related to the errors in precursor emissions, e.g. NO<sub>x</sub>, SO<sub>2</sub>. The RMSE of PM<sub>2.5</sub> is smaller in the southern part of the domain and along the coastline of China, while the model results are less satisfactory in the city clusters located in the central part of the domain, with very high RMSE of 60-80 µg m<sup>-3</sup> in three cities. The correlation coefficients for the individual cities are relatively constant around 0.7 with few cities characterized by lower correlation coefficients (mostly in the central part of the domain).

327

### 3283.3 Evaluation of the diurnal variation

We now examine the ability of the models to reproduce the diurnal variations of the chemical species' concentrations. We first provide a general view based on all observations in China and then examine the particular situation in the city of Beijing.

332

#### 3333.3.a Analysis based on all observations in China

The RMSE, BIAS, MNBIAS, and FGE of O<sub>3</sub>, NO<sub>2</sub>, PM<sub>10</sub> and PM<sub>2.5</sub> for the seven models and the ensemble median for all available observations in China are displayed over the forecasting time (0-23h) (Figure 6 and 7). Due to storage limitations, only the predictions for the first 24 hours (0-23h) were saved while the predictions for the 24h-72h period performed by all models were not retained. Unfortunately, this does not allow the investigation of a day to day degradation of the statistical indicators (from day1 to day3). Only the diurnal behavior of the statistical indicators can be assessed, which provides important hints for possible model issues.

341

It can be seen in the left panels of Figure 6 that the statistical indicators of NO<sub>2</sub> for the ensemble median is relatively stable over the time of the day, with slightly higher RMSE and higher BIAS/MNBIAS during the night time hours. For the individual models, the variability of the RMSE is somewhat higher during daytime, while some models exhibit very high RMSE and BIAS during the night time hours. Most models show a positive BIAS of NO<sub>2</sub> during the night, but a few of them exhibit a negative bias; this results in a relatively small BIAS for the ensemble median, showing good results with respect to the BIAS throughout the day.

349

In the case of ozone, the statistical indicators exhibit a variation over the time of the day. The RMSE is smallest between 7:00 and 9:00 local time, after which it increases until 18:00 in the evening to become constant at about 30 µg m<sup>-3</sup> during the night.

353

An examination of the BIAS and MNBIAS for O<sub>3</sub> over the day shows that O<sub>3</sub> is underestimated by nearly all models, apart from WRF-Chem-SMS. This might result from the slight overestimation of NO<sub>2</sub> concentrations by most models. Especially during nighttime when the height of the boundary layer is low, near surface NO<sub>2</sub> concentrations are high, and ozone is underestimated by 50% – 100% by most models. In the first hours of the day, only SILAMtest, WRF-Chem-SMS and LOTOS-



EUROS exhibit slightly positive O<sub>3</sub> BIAS. The same models produce a negative BIAS for NO<sub>2</sub> during the first hours of the day.

Figure 7 shows that the BIAS and MNBIAS of both PM<sub>10</sub> and PM<sub>2.5</sub> stay relatively constant over the time of the day. PM<sub>10</sub> is slightly underestimated by the ensemble median (-5 to -10%), while PM<sub>2.5</sub> is slightly overestimated (10 to 25%). In most cases, the models overestimate the PM<sub>2.5</sub> observations, while for PM<sub>10</sub> there are stronger differences between the individual models.

For PM<sub>10</sub> and PM<sub>2.5</sub>, the ensemble median exhibits a better performance than the individual models: the RMSE BIAS, MNBIAS and FGE of the ensemble are on average lower than the corresponding statistical parameters of the individual models. This demonstrates again the advantage of using the ensemble median for the prediction of PM<sub>10</sub> and PM<sub>2.5</sub>.

Figure 8 presents the diurnal variation of the concentrations of O<sub>3</sub>, NO<sub>2</sub>, O<sub>3</sub> + NO<sub>2</sub> and PM<sub>2.5</sub> from the individual models (and the ensemble median) and from the observations at a specific location (Beijing). The RMSE and the BIAS are also provided during the whole period under consideration.

It can be seen that the ensemble median (black line) underestimates the O<sub>3</sub> observations (red line) throughout the day, especially during the nighttime hours and in the late afternoon. Only WRF-Chem-SMS reproduces the amplitude of the O<sub>3</sub> diurnal cycle, but it also underestimates the O<sub>3</sub> concentrations after 18:00 when the height of the boundary layer is rapidly decreasing. All models and the ensemble median reproduce the diurnal cycle with a maximum in the late afternoon, but this maximum produced by the model appears about 2 hours earlier than observed. When considering the RMSE, the models produce the best results during the morning, and with increasing O<sub>3</sub> concentrations as the day progresses, the RMSE is also increasing. The negative BIAS is increasing for all models and for the model ensemble throughout the day.

### 3.3.b Analysis for the specific case of Beijing

In Beijing, the diurnal variation of the NO<sub>2</sub> concentrations is overestimated by the individual models as also reflected by the ensemble median. During the nighttime, for example, the observed concentrations are about 20-30 µg m<sup>-3</sup> lower than the concentrations associated with the ensemble median. The individual models and the ensemble median show a much stronger diurnal behavior than the observations. Atmospheric measurements suggest that the concentrations of NO<sub>2</sub> are relatively constant over the time of the day. This might be due to applied temporal profiles of the anthropogenic emissions or issues in the vertical mixing of the individual models. Also, the models with their spatial resolution may not capture the details seen in the observations by the ground network. The RMSE of all models and for the ensemble median is highest in late afternoon and during the night. The MarcoPolo-Panda prediction system has thus a tendency to overestimate surface NO<sub>2</sub>, which leads to an overestimation of the O<sub>3</sub> titration especially at night.

To further analyze the chemical coupling between ozone and NO<sub>2</sub>, we have added at each time step the mixing ratios of O<sub>3</sub> and NO<sub>2</sub>. The resulting variable, called Ox and expressed here in ppbv, has the advantage of not being affected by the fast interchange (null cycle) and the resulting partitioning between ozone and NO<sub>2</sub> produced by reactions NO + O<sub>3</sub>, NO<sub>2</sub> + hv and O + O<sub>2</sub> + M. If only these three rapid photochemical reactions are considered, Ox is a conserved quantity. In other words, even when a more comprehensive chemical scheme is adopted, the diurnal cycle of Ox should be considerably less pronounced than the diurnal cycle of NO<sub>2</sub> and O<sub>3</sub>.

In fact, in the model forecasts, the sum of  $O_3$  and  $NO_2$ , is nearly constant during the day, but exhibits nevertheless some diurnal variation, which appears to be weaker than in the observation. The calculated  $O_x$  is slightly too high at night and too low during daytime, suggesting an overestimation in photochemical activity by the majority of the models. The partitioning of  $O_x$  into  $NO_2$  and  $O_3$  is not well reproduced despite the simple chemistry that determines this partitioning:  $NO_2$  is generally too high and  $O_3$  too low, especially in the afternoon and early night. The simple partitioning approach does not seem to work properly under high  $NO_x$  loading. As a result, the diurnal cycle of  $O_3$  is not well reproduced by the forecasting ensemble and high ozone events are generally underestimated. This issue is discussed in more detail in the companion paper by Brasseur *et al.*, 2018.

The observed diurnal variation of  $PM_{2.5}$  is not well reproduced by the models and by the ensemble median. The calculated variability in Beijing is substantially higher than suggested by the observations (which are characterized by relatively constant concentrations throughout the day). The models show a maximum in  $PM_{2.5}$  concentrations around 8-9 a.m., and a second maximum during nighttime hours. This morning maximum is not present in the observations. The model ensemble is overestimating the observations in the morning and underestimating them in the early afternoon, resulting in a diurnal variability of the BIAS, shown in the lowest panel. Again, this might be related to the adopted diurnal profiles of the anthropogenic emission sources or might be due to errors in the formulation of vertical mixing in the PBL. Specifically, one should note that the models do not include a detailed formulation of small scale urban canopy effects, which could generate some mechanic and thermal turbulence with related vertical mixing during nighttime. With increased nighttime ventilation from the boundary layer to the free troposphere, the calculated amplitude of the diurnal variation of gases and particulates would be reduced and become closer to the observation.

#### 4. The impact of missing model data on the ensemble performance

To assess the impact on the ensemble forecast of occasionally missing results from one or several models, we compare the following ensembles during a given test period (1-30 May 2017), separately for  $O_3$ ,  $NO_2$  and  $PM_{2.5}$ : This approach has already been adopted by Marécal *et al.*, 2015, to evaluate European air quality predictions. We consider the following cases:

- 442- “MEDIAN 7”, the median provided by the operational ensemble method, which includes all seven models;
- 444- “MEDIAN 5”, the median built on five individual models, excluding the “best” and the “worst” models;
- 446- “MEDIAN 3”, the median built on three individual models, excluding the two “best” and the “two” worst models;
- 448- “BEST”, the model with the highest performance;
- 449- “WORST”, the model with the lowest performance.

Since the relative performance of individual models varies in time and space, the criterion to order the seven individual models from “worst to best” is provided by the value of their respective RMSE over the test period. For ozone, the criterion is measured by the RMSE over the 30 days between 12:00 and 18:00 LST (ozone peak time) (this criterion is based on the fact that the “best” model refers to the best forecast of daytime ozone levels). RMSE is seen as the most objective criterion since MB and MNMB can include compensating effects.

457  
458Figure 9 shows the statistical indicators for May 2017 as a function of the forecasting time (0-23h)  
459of the ensemble median based on all 7 models (MEDIAN7, shown in red), 5 models (MEDIAN5,  
460shown in blue), and 3 models (MEDIAN3, shown in black). The results are also shown for the  
461“best” and the “worst” model (BEST (magenta) and WORST (light blue)). For all three species, the  
462ensemble median based on 7 models is of highest quality (based on the statistical indicators used in  
463this analysis), and generally surpasses the results provided by the “best” model. When only 5  
464models (excluding the best and the worst) are available to calculate the ensemble, all statistical  
465indicators show only very small differences with the more inclusive MEDIAN7 case based on seven  
466models. Reducing the ensemble calculation further to three models (MEDIAN3), the statistical  
467scores degrade slightly compared to the MEDIAN7 and MEDIAN5 for all three species, but remain  
468higher or at least similar to the score of the “best” model (BEST).

469  
470It is interesting to note that the “best” model (BEST) is not the same model for the different months  
471that are investigated, nor the same model for all species. For example, in August 2016, the “best”  
472model for O<sub>3</sub> and PM<sub>2.5</sub> is IFS, while LOTOS-EUROS shows the best performance for NO<sub>2</sub>. In  
473May 2017, the best model for PM<sub>2.5</sub> is LOTOS-EUROS and the worst model is IFS, but the results  
474remain the same: the ensemble product performs better than (or at a similar level as) the best model.  
475Since the “BEST” model can change depending on time period and species, the ensemble product is  
476particularly valuable for the sustained quality of the forecasting system. This study shows therefore  
477that using the ensemble product (median) of models, even if occasionally based on fewer models, is  
478more useful than using a single model, even if the performance of this individual model is high. The  
479ensemble product is still robust compared to the observations if the output of some contributing  
480models is occasionally missing. It also shows that an ensemble product remains valuable even if  
481only few models are available for the production of the forecast.

482  
483

## 4845. Performance of the Forecasting System for Alert Warnings

485The prediction system has been designed to support the development of policies and the calculation  
486of air quality indices. One of the applications of the system is to provide alerts to the general public  
487when acute air pollution episodes are expected. Thus, the performance of the forecast system has  
488been tested regarding the likelihood to predict air pollution events. We will refer to this type of  
489forecast as binary prediction of events (*Brasseur and Jacob, 2017*).

490  
491A model prediction of a specific event such as an air pollution episode at a given location (e.g.  
492concentration of pollutants exceeding a regulatory threshold) is evaluated by considering a binary  
493variable and by distinguishing between four possible situations: (1) the event is predicted and  
494observed, (2) the event is not predicted and not observed, (3) the event is predicted but not  
495observed, (4) the event is not predicted but is observed. Cases (1) and (2) are regarded as successful  
496predictions (hits), while (3) and (4) are considered to be failures (misses). The skill of the model for  
497binary prediction (event or no event) is measured by the fractions of observed events that are  
498correctly predicted (probability of detection (POD)). The fraction of predicted events, that did not  
499occur is measured by the false alarm rate (FAR), both POD and FAR as defined in *Brasseur and*  
500*Jacob, 2017*.

501  
502We have calculated the POD and the FAR for the ensemble median for the cities of Beijing,  
503Shanghai and Guangzhou between April 2016 and June 2017, specifically for ozone (based on the 8  
504hour and the daily maximum value), NO<sub>2</sub> and PM<sub>2.5</sub>. Based on the 1-hourly time series of ozone,  
505NO<sub>2</sub> and PM<sub>2.5</sub>, the time series for 1) 1-hour ozone, 2) 8-hour ozone concentrations 3) 24-hour

mean NO<sub>2</sub> concentrations, 4) 1-hour NO<sub>2</sub> concentrations and 5) 24-hour PM<sub>2.5</sub> concentrations have been constructed and the thresholds of the air quality indices (AQI) have been applied for each definition. The definitions breakpoints for the individual air quality indices (AQI) are shown in Table 1 and Table 2; they are based on current definitions of AQI from the Chinese government.

510

511

512**Table 1:** Chinese AQI categories

513

| Index values | AQI levels | AQI categories      |
|--------------|------------|---------------------|
| 0-50         | 1          | Good                |
| 51-100       | 2          | Moderate            |
| 101-150      | 3          | Lightly polluted    |
| 151-200      | 4          | Moderately polluted |
| 201-300      | 5          | Heavily polluted    |
| >300         | 6          | Severely polluted   |

514

515

516**Table 2:** Individual AQI for 1-hour and 8-hour Ozone, 24-hour and 1-hour NO<sub>2</sub> and 24-hour PM<sub>2.5</sub>

517

| IAQI | 1-hour O <sub>3</sub><br>[µg m <sup>-3</sup> ] | 8-hour O <sub>3</sub><br>[µg m <sup>-3</sup> ] | 24-hour NO <sub>2</sub><br>[µg m <sup>-3</sup> ] | 1-hour NO <sub>2</sub><br>[µg m <sup>-3</sup> ] | 24-hour PM <sub>2.5</sub><br>[µg m <sup>-3</sup> ] |
|------|------------------------------------------------|------------------------------------------------|--------------------------------------------------|-------------------------------------------------|----------------------------------------------------|
| 0    | 0                                              | 0                                              | 0                                                | 0                                               | 0                                                  |
| 50   | 160                                            | 100                                            | 40                                               | 100                                             | 35                                                 |
| 100  | 200                                            | 160                                            | 80                                               | 200                                             | 75                                                 |
| 150  | 300                                            | 215                                            | 180                                              | 700                                             | 115                                                |
| 200  | 400                                            | 265                                            | 280                                              | 1200                                            | 150                                                |
| 300  | 800                                            | 800                                            | 565                                              | 2340                                            | 250                                                |
| 400  | 1000                                           | Use hourly                                     | 750                                              | 3090                                            | 350                                                |
| 500  | 1200                                           | Use hourly                                     | 940                                              | 3840                                            | 500                                                |

518

519

In order to highlight the presence of thresholds violated during the time period under consideration, Figure 10-12 show the time series for the period April 2016 – July 2017 of the 1) daily maximum ozone concentrations, 2) 8-hour moving average of ozone, 3) the 24-hour mean NO<sub>2</sub> concentrations, 4) the daily maximum NO<sub>2</sub> concentrations and 5) the 24-hour mean PM<sub>2.5</sub> concentrations for Beijing (Figure 10), Shanghai (Figure 11) and Guangzhou (Figure 12) derived from the model and from the observations at each location. Pink lines indicate the thresholds for the air quality indices for moderate (line), lightly polluted (dashed line) and moderately polluted (dotted line) conditions for each pollutant.

528

In Beijing and Shanghai, the daily maximum ozone concentrations exceeded the thresholds of 160 (moderate) and 200 (lightly polluted) within the considered time period only during the months of April to September 2016. During the months of October 2016 to March 2017, the ozone concentrations remained below the threshold of 160, highlighting fair air quality conditions with regard to ozone in wintertime. In Beijing, the ensemble median has a probability of detection of air pollution events for moderate 1-hour ozone AQI of 0.44 (55 out of 126 events of 1-hour ozone

535breaking the threshold of  $160 \mu\text{g m}^{-3}$  have been detected). The False Alarm Rate (FAR) is 0.05 (the  
536model ensemble predicted 58 events where ozone exceeds the threshold of  $160 \mu\text{g m}^{-3}$ , where 3 out  
537of these 58 events were false alarm (observations below the threshold). Lightly polluted events (1-  
538hour ozone exceeding  $200 \mu\text{g m}^{-3}$ ) were correctly predicted only 14 times, while the observations  
539exceeded the threshold 79 times. The FAR for lightly polluted ozone events is 0.12 (2 out of 16).

540  
541For moderately polluted ozone events (1-hour ozone exceeding  $300 \mu\text{g m}^{-3}$ ), the POD is 0, the  
542model ensemble was not able to predict the 4 observed events (FAR is not applicable, (0 out of 0)).  
543Looking at the 8-hour ozone predictions for Beijing, the model ensemble is very similar, with a  
544POD of 0.45 (864 out of the 1921 observed events have been predicted correctly) and a FAR of  
5450.06 (56 counts are false alarm out of 920 events). For lightly polluted ozone conditions, the POD is  
5460.18 (118 out of 657 observed events) with a FAR = 0.06 (7 out of 125 are false alarm). For  
547moderately polluted conditions, the model ensemble predicted 7 out of 150 observed events  
548correctly with a FAR of 0.22 (2 out of 9 alarms are false).

549  
550For Shanghai, the PODs for ozone predictions are lower than in Beijing: for moderate air quality  
551conditions, the POD is 0.16 (15 out of 92 observed events are predicted correctly) with a FAR of 0  
552(no false alarm) for 1-hour ozone predictions, and POD = 0.21 (488 out of 2346 observed events)  
553with a FAR of 0.01 (7 false alarms relative to 495 counts) for 8-hour ozone predictions. For lightly  
554polluted conditions, the POD is decreasing: POD = 0.08 (3 correct predictions out of 38 observed  
555events) with FAR of 0 (no false alarm, 3 correct predictions) for 1-hour ozone, and POD = 0.07 (27  
556out of 398 observed) with a FAR of 0.10 (3 false alarms out of 30) for 8-hour ozone. For  
557moderately polluted conditions (1-hour ozone exceeding  $300 \mu\text{g m}^{-3}$  or 8-hour ozone exceeding  $215$   
558 $\mu\text{g m}^{-3}$ ), the POD for 1-hour ozone is not applicable (no predicted, no observed events), and for 8-  
559hour ozone POD = 0 (0 predicted out of the 29 observed), FAR = 1 (2 false alarms out of 2  
560predicted, but not observed).

561  
562In Guangzhou, there is no clear difference between ozone conditions in summer or wintertime  
563during the considered time period. Ozone observations regularly exceed the threshold of 160  
564(moderate) and  $200 \mu\text{g m}^{-3}$  (lightly polluted) during the whole time period, and 5 times 1-hour  
565ozone is exceeding the threshold of  $300 \mu\text{g m}^{-3}$ .

566  
567The POD of 1-hour ozone in Guangzhou is 0.16 (15 correct predictions out of 94 observed) with  
568FAR = 0.21 (4 false alarms out of 19 predicted) for moderate conditions, and POD = 0.03 (1  
569predicted out of 36 observed) with FAR = 0 (0 out of 1 predicted) for lightly polluted conditions,  
570and POD = 0 (0 predicted out of 5 observed events) for moderately polluted ozone conditions. For  
5718-hour ozone, the POD is 0.31 (315 correct predicted out of 1032 observed) with FAR = 0.28 (122  
572false alarms of 437 predicted events) for moderate conditions, POD = 0.06 (12 out of 217 observed)  
573with FAR = 0 (no false alarm out of 12 predicted events) for lightly polluted ozone conditions, and  
574POD = 0 (0 out of 47 observed events) for moderately polluted ozone conditions.

575  
576In general, the ability of the model ensemble to predict correctly ozone air pollution events is best  
577for light ozone pollution, while it fails to predict correctly the ozone pollution events for moderately  
578polluted situations. This is mostly a result of the model ensemble being too low compared to the  
579observations. The predictions can be improved by applying a bias correction to the ozone  
580predictions. This is investigated in the following Section 5.1.

581  
582The  $\text{NO}_2$  predictions of the ensemble median are in general too high compared to the observation,  
583especially in Beijing and Shanghai. Especially, in summertime (June/July/August/September), the  
584model predictions are sometimes twice as high as the observations, which might be a result of



uncertainties in the emissions. In all three cities under consideration, the  $\text{NO}_2$  concentrations are only exceeding the thresholds of  $40 \mu\text{g m}^{-3}$  for 24-hour  $\text{NO}_2$  (100 for 1-hour  $\text{NO}_2$ ) and  $80 \mu\text{g m}^{-3}$  for 24-hour  $\text{NO}_2$  ( $200 \mu\text{g m}^{-3}$  for 1-hour  $\text{NO}_2$ ) during the considered period (moderate and lightly polluted conditions for  $\text{NO}_2$ ). During wintertime (November/December/January), the observations are slightly higher than in summer and the ensemble system is in better agreement with the observations.

In Beijing, the POD for 24-hour  $\text{NO}_2$  is 1 (214 of 214 observed events are predicted) for moderate conditions with a FAR of 0.46 (180 false alarms relative to 394 predicted events). This indicates that  $\text{NO}_2$  is generally overestimated by the model ensemble. For lightly polluted events, the POD is 0.79 (27 predicted out of 34 observed events) with FAR = 0.70 (63 false alarms out of 90 predicted). For the 1-hour  $\text{NO}_2$ , the POD for moderate conditions is 0.61 (36 out of 59 observed events) with FAR = 0.80 (141 false alarms out of 177 predicted). For lightly polluted conditions, no events have been observed nor predicted for 1-hour  $\text{NO}_2$  in Beijing during the considered period. In Beijing, the threshold for moderately polluted  $\text{NO}_2$  conditions has not been exceeded neither by 1-hour  $\text{NO}_2$  nor by 24h-  $\text{NO}_2$  during the considered period.

In Shanghai, the numbers are very similar to those in Beijing: POD for 24-hour  $\text{NO}_2$  is 1 (208 of 208 observed events are predicted) for moderate conditions with a FAR of 0.42 (152 false alarms of 360 predicted events). There is also a general overestimation by the model ensemble compared to the observations. For lightly polluted conditions, the POD for 24-hour  $\text{NO}_2$  is 0.67 (10 out of 15 observed) and a FAR of 0.86 (60 false alarms of 70 predicted), which is a clear result of the overestimated  $\text{NO}_2$ . For the 1-hour  $\text{NO}_2$ , the POD is 0.91 (48 predicted out of 53 observed) with a FAR of 0.70 (111 false alarms out of 159 predicted) for moderate conditions. The thresholds for lightly polluted and moderately polluted conditions for 1-hour  $\text{NO}_2$  have not been exceeded in Shanghai during the considered period, but there was 1 false alarm (1 out of 1) for lightly polluted conditions.

In Guangzhou, the model ensemble and the observations for  $\text{NO}_2$  are in better agreement. There is slight overestimation of the  $\text{NO}_2$  concentrations from May to September 2016, and in May 2017, but in general, there is a good agreement between the model time series and the observations. The POD for 24h- $\text{NO}_2$  exceeding the threshold for moderate conditions is 0.94 (208 predicted out of 222 observed) with a FAR of 0.35 (110 false alarms of 318 predicted events), for lightly polluted conditions POD is 0.56 (15 predicted out of 27 observed) with 32 false alarms out of 47 predicted events (FAR = 0.69). Stronger polluted events have not been observed nor predicted for  $\text{NO}_2$  in Guangzhou. For the 1-hour  $\text{NO}_2$ , 58 events have been predicted out of 76 observed for moderate conditions (POD = 0.76, FAR = 0.63 (97 false alarms out of 155 predicted). For lightly polluted conditions, there was 1 false alarm (1 out of 1), with neither observed nor correctly predicted events.

The thresholds for moderately polluted conditions for 24-hour  $\text{NO}_2$  and 1-hour  $\text{NO}_2$  have not been exceeded in Guangzhou during the considered period, no events have been predicted nor observed.

The predictions of  $\text{PM}_{2.5}$  concentrations (24-hour  $\text{PM}_{2.5}$ ) of the model ensemble are in very good agreement with the observations in all three cities during the considered period.

In Beijing, the POD for the prediction of moderate condition for 24-h  $\text{PM}_{2.5}$  is 0.95 (268 correctly predicted events out of 283 observed) with a FAR of 0.19 (61 false alarms out of 329 predicted events). For lightly polluted conditions, the POD is 0.76 (111 correct predicted events of 146 observed events) with a FAR of 0.28 (43 false alarms for 154 predicted events). Moderately

634polluted PM<sub>2.5</sub> events have been correctly predicted 33 times out of 64 observed events (POD =  
6350.52) with a FAR of 0.35 (18 false alarms out of 51 predicted events).

636  
637In Shanghai, 191 moderate condition-events for PM<sub>2.5</sub> have been correctly predicted out of 220  
638observed events (POD = 0.87, FAR = 0.19), with 46 false alarms out of the 237 predicted events.  
639For lightly polluted events, the POD is 0.84 (32 out of 38 observed events) with a FAR of 0.47 (28  
640false alarms of 60 predicted events). For moderately polluted conditions of PM<sub>2.5</sub>, the POD is 0.50  
641(3 correctly predicted events out of 6 observed) with a relatively high FAR (0.67, 6 false alarms out  
642of 9 predicted).

643  
644In Guangzhou, the POD for moderate conditions of PM<sub>2.5</sub> is 0.85 (149 correctly predicted out of  
645175 observed) with 65 false alarms out of 214 predicted events (FAR = 0.30). Lightly polluted  
646events have been observed only 7 times, the ensemble median predicted 4 of them correctly (POD =  
6470.57), but with a very high false alarm rate (16 false alarms out of 20 predicted events, FAR =  
6480.80), this indicates a slight overestimation of the PM<sub>2.5</sub> concentrations of the models compared to  
649the observations. In Guangzhou, no moderately polluted events of PM<sub>2.5</sub> have been observed nor  
650predicted during the considered period.

651  
652Only in Beijing, and only with regard to 24-hour PM<sub>2.5</sub>, heavily polluted conditions have been  
653observed and predicted during the considered period in the winter months 2016/2017: The POD is  
6540.5 (18 correct predicted out of 36 observed events) with a FAR of 0.28 (7 false alarms out of 25).

655  
656These investigations show, that the model ensemble is well suited to be used in air quality  
657predictions of PM<sub>2.5</sub>. For ozone, due to biases of the model ensemble compared to observations,  
658the model ensemble is not able to predict ozone pollution in an appropriate way. Although the FAR  
659is very low for ozone predictions, the POD of model ensemble is not very high. In the following  
660Section, we apply bias correction to improve the predictions for ozone pollution events.

661

## 6625.1 Bias Correction for Ozone Predictions

663Bias corrections can be applied to improve the predictions of an individual model or a model  
664ensemble. In our case, we have calculated the summertime bias of the time series of the hourly  
665ozone concentrations from the model ensemble with respect to the hourly observations, and  
666subtracted the bias from the hourly time series. For predictions of ozone air pollution, the  
667summertime is an appropriate season to consider since the ozone thresholds are exceeded only  
668during this season. As the bias between the observations and the model might not be the same for  
669each month, and our goal is to obtain the best improvement in the ozone predictions for  
670summertime, we have subtracted the mean summertime bias (mean of the bias of June/July/August/  
671September 2016) from the original time series. The daily maximum ozone values and the 8-hour  
672moving average for the corrected time series have then been calculated. The resulting, POD and  
673FAR for 1-hour ozone and 8-hour ozone under different air quality conditions are shown in Table 3.  
674This table shows that, for bias-corrected predictions, the POD in all three cities is larger than for the  
675non-corrected time series, especially in the case of moderate and lightly polluted conditions of  
676ozone. Thus, the predictions of air pollution events are significantly improved when the bias  
677correction is applied in the case of ozone. Only for the predictions of moderately polluted  
678conditions of ozone, the POD is not changing. The FAR is also slightly decreasing for all cities, but  
679the improvement is small.

680  
681In Beijing, the POD air pollution events represented by a moderate AQI for 1-hour ozone increased  
682from 0.44 for Beijing (55 out of 126 observed events) before bias correction to 0.69 (87 out of 126

683events) after bias correction. The False Alarm Rate (FAR) also increased from 0.05 (3 false alarms  
684out of these 58 events) to 0.10 (10 false alarms out of 97 predicted events). Lightly polluted events  
685(1-hour ozone exceeding  $200 \mu\text{g m}^{-3}$ ) have been predicted correctly 31 times (14 times without the  
686corrections), while the observations exceeded the threshold 79 times. The FAR for lightly polluted  
687ozone events also slightly increased from 0.125 (2 out of 16) to 0.2 (8 false alarms out of 40).

688  
689For moderately polluted ozone events (1-hour ozone exceeding  $300 \mu\text{g m}^{-3}$ ), the POD for the bias-  
690corrected prediction is still 0. The model ensemble was not able to predict the 4 observed events  
691(FAR is not applicable, (0 out of 0)).

692  
693Looking at the 8-hour ozone predictions for Beijing, the POD of 0.45 (864 out of the 1921 observed  
694events have been predicted correctly) increased to 0.76 (1452 out of 1921) after bias corrections,  
695and the FAR from 0.06 (56 counts are false alarm out of 920) to 0.23 (424 false alarms out of 1876  
696predictions) for moderate ozone pollution. For lightly polluted ozone conditions, the POD increased  
697to 0.44 (291 out of 657) and FAR = 0.22 (81 false alarms of 372 predicted) for the bias corrected  
698predictions compared to POD = 0.18 (118 out of 657 observed events) with a FAR = 0.06 (7 out of  
699125 are false alarm). For moderately polluted conditions, the model ensemble with bias corrected  
700predicted 27 (instead of only 7) out of 150 observed events correctly with a FAR of 0.28 (13 false  
701alarms of 47 predictions) compared to FAR of 0.22 (2 out of 9 are false alarm).

702  
703For Shanghai, for moderate air quality conditions of ozone, the POD increased from 0.16 to 0.51  
704(47 (15 for non-corrected) out of 92 observed events are predicted correctly); the FAR increased  
705from 0 (no false alarm) to 0.10 (5 false alarms out of 52) for 1-hour Ozone predictions. For 8-hour  
706ozone predictions, the POD increased from 0.21 to 0.66 (1554 (non-corrected: 488) out of 2346  
707observed events), the FAR increased from 0.01 (7 false alarms of 495 predicted events) to 0.32  
708(726 false alarms of 2280 counts) for 8-hour ozone predictions. For lightly polluted ozone  
709conditions, the POD increased from 0.08 (3 correct predictions out of 38 observed) with FAR of 0  
710(no false alarm, 3 correct predictions) to POD = 0.34 (13 out of 38) with FAR = 0.07 (1 false alarm  
711of 14 predicted events) for 1-hour ozone, and for 8-hour ozone, the POD increased from 0.07 to  
7120.27 (109 (non-corrected: 27) out of 398 observed) and the FAR increased from 0.10 (3 false alarms  
713out of 30) to 0.13 (16 false alarms in 125 predicted events). For moderately polluted ozone  
714conditions, the POD for 1-hour ozone is not applicable for both non-corrected and bias-corrected  
715predictions (no predicted, no observed events), but for the bias-corrected prediction, one false alarm  
716is observed (FAR = 1, 1 false alarm in 1 predicted event), and for 8-hour ozone POD increased  
717from 0 to 0.10 (3 (non-corrected: 0) predicted out of the 29 observed), the FAR decreased from 1 (2  
718false alarms out of 2 predicted, but not observed) to 0.8 (12 false alarms of 15 predicted events).

719  
720In Guangzhou, the predictions are not as accurate as in Beijing and Shanghai, and the bias  
721corrections result only in slight improvements of the ozone forecasts for Guangzhou. The POD of 1-  
722hour ozone in Guangzhou increased from 0.16 to 0.32 (30 (non-corrected: 15) correct predictions  
723out of 94 observed) and the FAR slightly increased from 0.21 (4 false alarms out of 19 predicted) to  
7240.33 (15 false alarms out of 45 predicted events) for moderate conditions. For lightly polluted ozone  
725conditions, the POD increased from 0.03 to 0.14 (5 (non corrected: 1) predicted out of 36 observed)  
726and the FAR increased from 0 (0 out of 1 predicted) to 0.29 (2 false alarms of 7 predicted events).  
727For moderately polluted ozone predictions, the POD and FAR did not change with bias corrections  
728(POD = 0 (0 predicted out of 5 observed events), FAR not applicable).

729  
730For 8-hour ozone of moderate conditions, the POD increased from 0.31 to 0.49 (508 (non-corrected:  
7311315) correct predicted out of 1032 observed) and the FAR increased from 0.28 (122 false alarms of  
732437 predicted events) to 0.37 (296 false alarms for 804 predictions). For lightly polluted ozone

conditions the POD increased from 0.06 to 0.13 (29 (non-corrected: 12) out of 217 observed) and the FAR increased from 0 (no false alarm out of 12 predicted events) to 0.19 (7 false alarms for 36 predicted events). For moderately polluted ozone conditions, the POD and FAR did not change with bias corrections (POD= 0 (0 out of 47 observed events), FAR not applicable).

Figure 13 a–c shows the time series of the model ensemble, the bias corrected time series of the model ensemble and the observations. For the daily maximum ozone, the bias correction results in a better agreement with the observations, which also results in better event predictions. For 8-hour ozone, there is better agreement during summertime, while during the wintertime, the bias-corrected ozone time series are too high compared to the observations (both correcting for the bias derived from the total time series, or only from the summertime time series). This shows (as we have seen in Section 3.1), that the bias is not the same during the whole year, and also that the diurnal cycle of ozone is not well captured by the model ensemble. While the bias corrected daily maximum ozone is in better agreement with the observations, the 8-hour bias corrected moving average is too high during winter time (with very low ozone concentrations). As the ozone is too low in winter to exceed the lowest threshold (moderate conditions) for air quality index calculations, this is not affecting the quality of the event prediction. A more sophisticated bias-correction (bias correction with diurnal and annual variation included) could be applied to further improve the predictions, provided that a longer time series (more than one year of data) is available. The statistical bias correction can then be used for the improvement of future predictions.

## 6. Conclusions and Future Developments

In this paper, we evaluate the forecasting system developed and implemented as part of the EU Panda and MarcoPolo projects after a little more than one year of operation. The forecasting system is based on an ensemble of seven state-of-the-art chemistry-transport models (CHIMERE, EMEP, IFS, LOTOS-EUROS, WRF-Chem-MPIM, WRF-Chem-SMS, SILAMtest). Each model is executed on a computer platform hosted by individual institutes in China and Europe. Input for meteorological forcing, emissions and boundary conditions have been carefully chosen and adopted for the specific situation of China, but vary from model to model. The forecasting system provides every day hourly forecasts for 3 days ahead for four major chemical pollutants ( $O_3$ ,  $NO_2$ ,  $PM_{10}$  and  $PM_{2.5}$ ) together with hourly observational data provided by the Chinese observational network ([www.pm25.in](http://www.pm25.in)).

The models, whose predictions are strongly influenced by the adopted weather forecast, reproduce in general the regional features and capture many air pollution events. In most cases, the model ensemble reproduces satisfactorily the day-to-day variability of the concentrations of the primary and secondary air pollutants and in particular, predicts the occurrence of pollution events a few days before they occur. Overall, and in spite of some discrepancies, the air quality forecasting system is well suited for the prediction of air pollution events and has the ability to be used for alert warning (binary prediction) of the general public, specifically if bias corrections are applied to improve the ozone forecasts.

In most cases, the ensemble approach provides more accurate forecasts and reduces the uncertainties in comparison with the individual models results. The calculation of the median of all models is also relatively insensitive to model outliers, and is computationally efficient. Using the ensemble median based on all models provides the best performance for all species, as the relative performance of any individual model may vary in time, space and species. We showed, that the

ensemble product, even if occasionally based on fewer models, is more useful than a single model of good quality, and that the ensemble product is still robust compared to the observations if data from some contributing models are occasionally missing.

Despite the fact that the prediction system is in its development phase and that the resources available to improve the system are limited, the MarcoPolo and Panda forecasting system can be viewed as already quite successful. The inter-comparison presented in the companion paper by Brasseur *et al.*, 2018 and the present evaluation were performed to diagnose differences between models, identify problems and contribute to individual model improvements. Specifically, the underestimation of ozone under high NO<sub>x</sub> conditions and the resulting errors in the diurnal cycle of ozone need to be addressed in an effort to improve the model forecasts in China. Although major efforts are ongoing to improve emission inventories for China, the remaining uncertainties, especially in regard to local emissions, may partly explain the differences between models and observations. This is subject of further investigation. Furthermore, data assimilation of satellite and in situ observations should significantly improve the performance of the forecasting system (see e.g., Mizzi *et al.*, 2016). Finally, a more advanced approach to extract observations provided by the Chinese network is expected to improve the model-data comparison.

## Data Availability

The models described here are used operationally by the participating research and service organizations involved in the present study. The data produced by the multi-model forecasting system are available from the Royal Dutch Meteorological Institute (KNMI).

## Acknowledgements

The model inter-comparison presented in the present study has been conducted during a workshop organized in May 2017 by the Shanghai Meteorological Service (SMS) in China. The authors thank Dr. Jianming Xu for hosting this meeting and providing support to the participants. The ensemble of models described here has been produced under the Panda and MarcoPolo projects supported by the European Commission within the Framework Program 7 (FP7) under grant agreements n°606719 and n°606953. The National Center for Atmospheric Research (NCAR) is sponsored by the US National Science Foundation. We thank the two anonymous reviewers whose comments helped improve and clarify this manuscript.

**Table 3:** POD and FAR for Beijing, Shanghai and Guangzhou



829  
830

|                                                            | Probability of Detection (POD) |                                 |                                    | False Alarm Rate (FAR)     |                                 |                                    |
|------------------------------------------------------------|--------------------------------|---------------------------------|------------------------------------|----------------------------|---------------------------------|------------------------------------|
| <b>Beijing</b>                                             | <b>AQI 2</b><br>(moderate)     | <b>AQI 3</b><br>(lightly poll.) | <b>AQI 4</b><br>(moderately poll.) | <b>AQI 2</b><br>(moderate) | <b>AQI 3</b><br>(lightly poll.) | <b>AQI 4</b><br>(moderately poll.) |
| 1-hour O <sub>3</sub> [µg m <sup>-3</sup> ]                | 0.44<br>(55/126)               | 0.18<br>(14/79)                 | 0<br>(0/4)                         | 0.05<br>(3/58)             | 0.12<br>(2/16)                  | NA<br>(0/0)                        |
| Bias corrected 1-hour O <sub>3</sub> [µg m <sup>-3</sup> ] | 0.69<br>(87/126)               | 0.41<br>(32/79)                 | 0<br>(0/4)                         | 0.10<br>(10/97)            | 0.20<br>(8/40)                  | NA<br>(0/0)                        |
| 8-hour O <sub>3</sub> [µg m <sup>-3</sup> ]                | 0.45<br>(864/1921)             | 0.18<br>(118/657)               | 0.05<br>(7/150)                    | 0.06<br>(56/920)           | 0.06<br>(7/125)                 | 0.22<br>(2/9)                      |
| Bias corrected 8-hour O <sub>3</sub> [µg m <sup>-3</sup> ] | 0.76<br>(1452/1921)            | 0.44<br>(291/657)               | 0.23<br>(34/150)                   | 0.23<br>(424/1876)         | 0.21<br>(81/372)                | 0.28<br>(13/47)                    |
| 24-hour NO <sub>2</sub> [µg m <sup>-3</sup> ]              | 1<br>(214/214)                 | 0.79<br>(27/34)                 | NA<br>(0/0)                        | 0.46<br>(180/394)          | 0.70<br>(63/90)                 | NA<br>(0/0)                        |
| 1-hour NO <sub>2</sub> [µg m <sup>-3</sup> ]               | 0.61<br>(36/59)                | NA<br>(0/0)                     | NA<br>(0/0)                        | 0.80<br>(141/177)          | NA<br>(0/0)                     | NA<br>(0/0)                        |
| 24-hour PM2.5 [µg m <sup>-3</sup> ]                        | 0.95<br>(268/283)              | 0.76<br>(111/146)               | 0.52<br>(33/64)                    | 0.19<br>(61/329)           | 0.28<br>(43/154)                | 0.35<br>(18/51)                    |
| <b>Shanghai</b>                                            |                                |                                 |                                    |                            |                                 |                                    |
| 1-hour O <sub>3</sub> [µg m <sup>-3</sup> ]                | 0.16<br>(15/92)                | 0.08<br>(3/38)                  | NA<br>(0/0)                        | 0<br>(0/15)                | 0<br>(0/3)                      | NA<br>(0/0)                        |
| Bias corrected 1-hour O <sub>3</sub> [µg m <sup>-3</sup> ] | 0.51<br>(47/92)                | 0.34<br>(13/38)                 | NA<br>(0/0)                        | 0.10<br>(5/52)             | 0.07<br>(1/14)                  | 1<br>(1/1)                         |
| 8-hour O <sub>3</sub> [µg m <sup>-3</sup> ]                | 0.21<br>(488/2346)             | 0.07<br>(27/398)                | 0<br>(0/29)                        | 0.01<br>(7/495)            | 0.10<br>(3/30)                  | 1<br>(2/2)                         |
| Bias corrected 8-hour O <sub>3</sub> [µg m <sup>-3</sup> ] | 0.66<br>(1554/2346)            | 0.27<br>(109/398)               | 0.10<br>(3/29)                     | 0.32<br>(726/2280)         | 0.13<br>(16/125)                | 0.80<br>(12/15)                    |
| 24-hour NO <sub>2</sub> [µg m <sup>-3</sup> ]              | 1<br>(208/208)                 | 0.67<br>(10/15)                 | NA<br>(0/0)                        | 0.42<br>(152/360)          | 0.86<br>(60/70)                 | NA<br>(0/0)                        |
| 1-hour NO <sub>2</sub> [µg m <sup>-3</sup> ]               | 0.91<br>(48/53)                | NA<br>(0/0)                     | NA<br>(0/0)                        | 0.70<br>(111/159)          | 1<br>(1/1)                      | NA<br>(0/0)                        |
| 24-hour PM2.5 [µg m <sup>-3</sup> ]                        | 0.87<br>(191/220)              | 0.84<br>(32/38)                 | 0.50<br>(3/6)                      | 0.19<br>(46/237)           | 0.47<br>(28/60)                 | 0.67<br>(6/9)                      |
| <b>Guangzhou</b>                                           |                                |                                 |                                    |                            |                                 |                                    |
| 1-hour O <sub>3</sub> [µg m <sup>-3</sup> ]                | 0.16<br>(15/94)                | 0.03<br>(1/36)                  | 0<br>(0/5)                         | 0.21<br>(4/19)             | 0<br>(0/1)                      | NA<br>(0/0)                        |
| Bias corrected 1-hour O <sub>3</sub> [µg m <sup>-3</sup> ] | 0.32<br>(30/94)                | 0.14<br>(5/36)                  | 0<br>(0/5)                         | 0.33<br>(15/45)            | 0.29<br>(2/7)                   | NA<br>(0/0)                        |
| 8-hour O <sub>3</sub> [µg m <sup>-3</sup> ]                | 0.31<br>(315/1032)             | 0.06<br>(12/217)                | 0<br>(0/47)                        | 0.28<br>(122/437)          | 0<br>(0/12)                     | NA<br>(0/0)                        |
| Bias corrected 8-hour O <sub>3</sub> [µg m <sup>-3</sup> ] | 0.49<br>(508/1032)             | 0.13<br>(29/217)                | 0<br>(0/47)                        | 0.37<br>(296/804)          | 0.19<br>(7/36)                  | NA<br>(0/0)                        |
| 24-hour NO <sub>2</sub> [µg m <sup>-3</sup> ]              | 0.94<br>(208/222)              | 0.56<br>(15/27)                 | NA<br>(0/0)                        | 0.35<br>(110/318)          | 0.68<br>(32/47)                 | NA<br>(0/0)                        |
| 1-hour NO <sub>2</sub> [µg m <sup>-3</sup> ]               | 0.76<br>(58/76)                | NA<br>(0/0)                     | NA<br>(0/0)                        | 0.63<br>(97/155)           | 1<br>(1/1)                      | NA<br>(0/0)                        |
| 24-hour PM2.5 [µg m <sup>-3</sup> ]                        | 0.85<br>(149/175)              | 0.57<br>(4/7)                   | NA<br>(0/0)                        | 0.30<br>(65/214)           | 0.80<br>(16/20)                 | NA<br>(0/0)                        |

832  
833  
834

**Table 4:** POD and FAR for PM2.5 for Beijing under heavily polluted conditions.

| Beijing AQI heavily polluted           | POD             | FAR            |
|----------------------------------------|-----------------|----------------|
| 24-hour PM2.5 [ $\mu\text{g m}^{-3}$ ] | 0.50<br>(18/36) | 0.28<br>(7/25) |

841

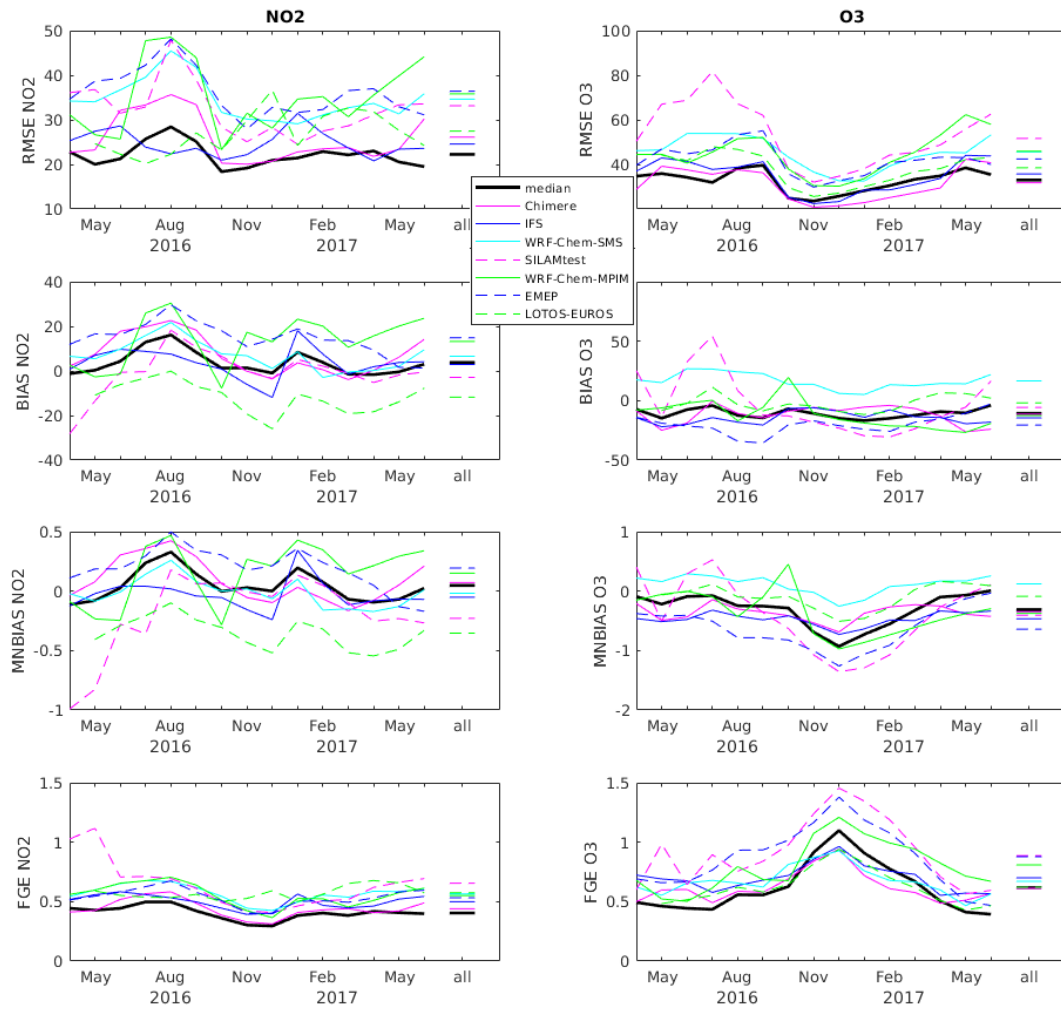

842  
 843Figure 2: RMSE (in  $\mu\text{g}/\text{m}^3$ ), BIAS (in  $\mu\text{g}/\text{m}^3$ ), MNBIAS and FGE of  $\text{NO}_2$  and  $\text{O}_3$  for each month  
 844and for the entire time period (April 2016 – June 2017, lines on the right side of each panel).

845

846

847

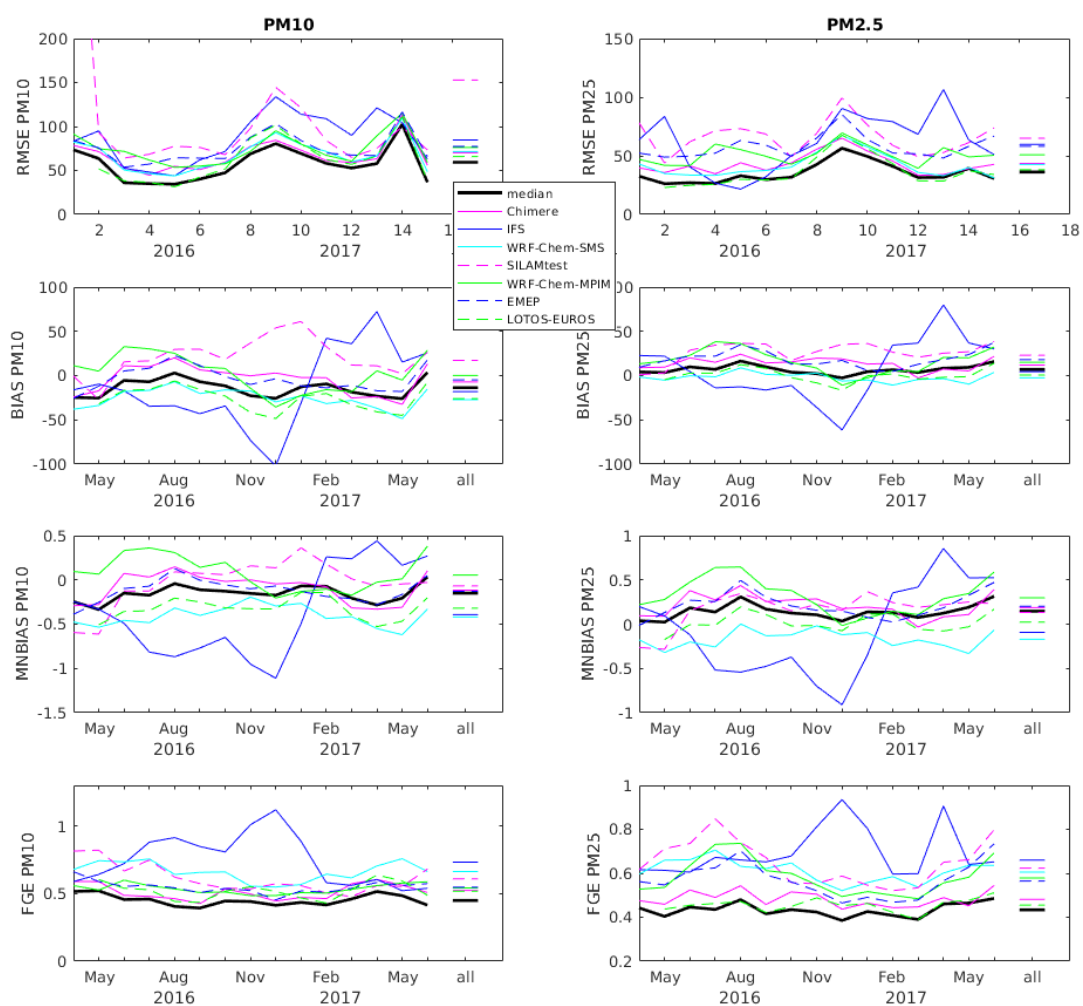

848  
849



851Figure 3: RMSE (in  $\mu\text{g}/\text{m}^3$ ), BIAS (in  $\mu\text{g}/\text{m}^3$ ), MNBIAS and FGE of PM10 and PM2.5 for each  
852month and for the entire time period (April 2016 – June 2017, lines on the right side of each panel).

853  
854  
855  
856  
857  
858  
859  
860



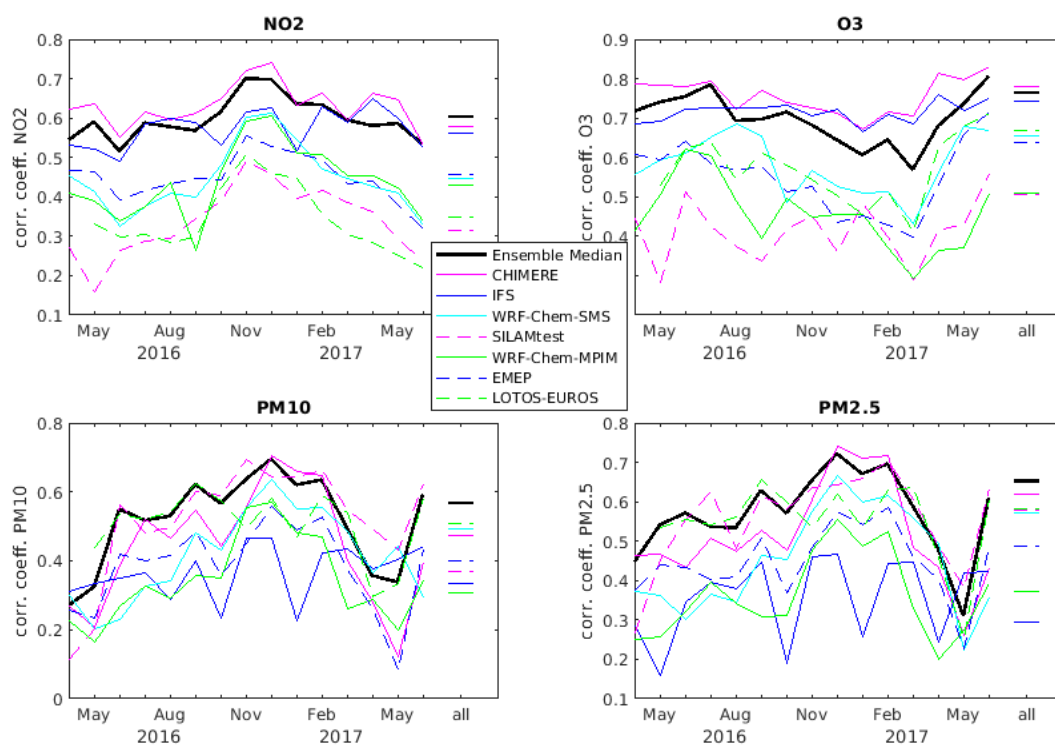

862  
 863  
 864Figure 4: Correlation coefficients based on hourly concentrations of NO<sub>2</sub>, O<sub>3</sub>, PM<sub>10</sub> and PM<sub>2.5</sub> for  
 865each month and for the entire time period between April 2016 and June 2017 (lines on the right  
 866side of each panel).

867  
 868  
 869  
 870  
 871  
 872  
 873  
 874  
 875  
 876  
 877  
 878  
 879  
 880  
 881  
 882  
 883  
 884  
 885  
 886  
 887  
 888

889  
890  
891  
892  
893  
894  
895  
896  
897  
898  
899  
900  
901  
902  
903  
904  
905  
906  
907  
908  
909  
910  
911  
912  
913  
914  
915  
916  
917  
918  
919  
920  
921  
922  
923  
924  
925  
926  
927  
928  
929  
930  
931

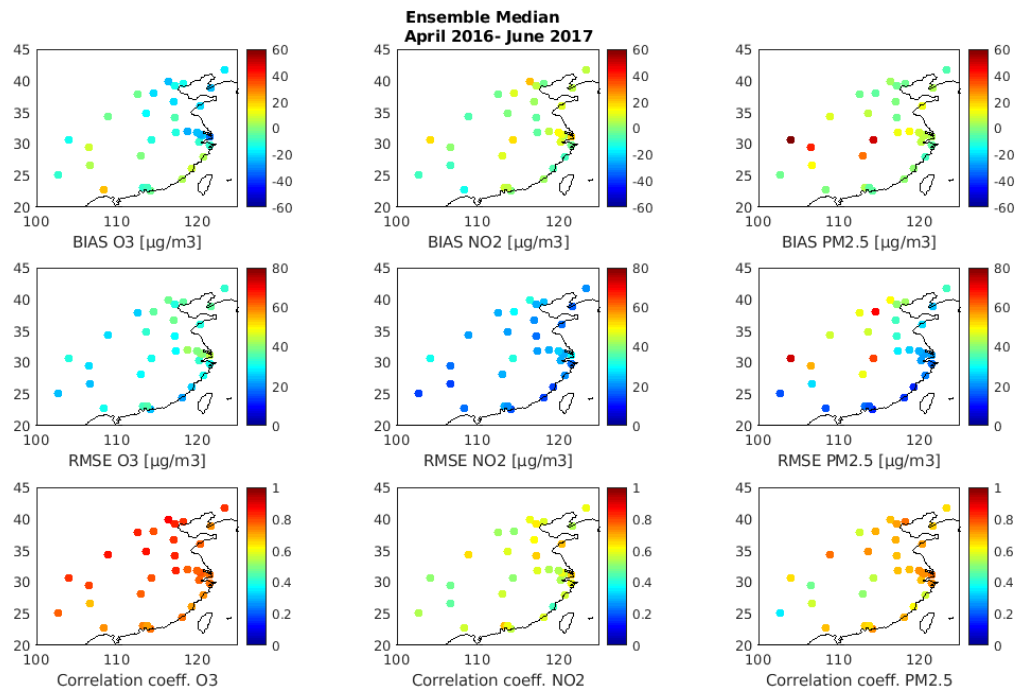

933

934Figure 5: Map of the BIAS, RMSE and temporal correlation coefficient of O<sub>3</sub>, NO<sub>2</sub> and PM<sub>2.5</sub> for  
935the whole time period (April 2016 until June 2017) for each city.

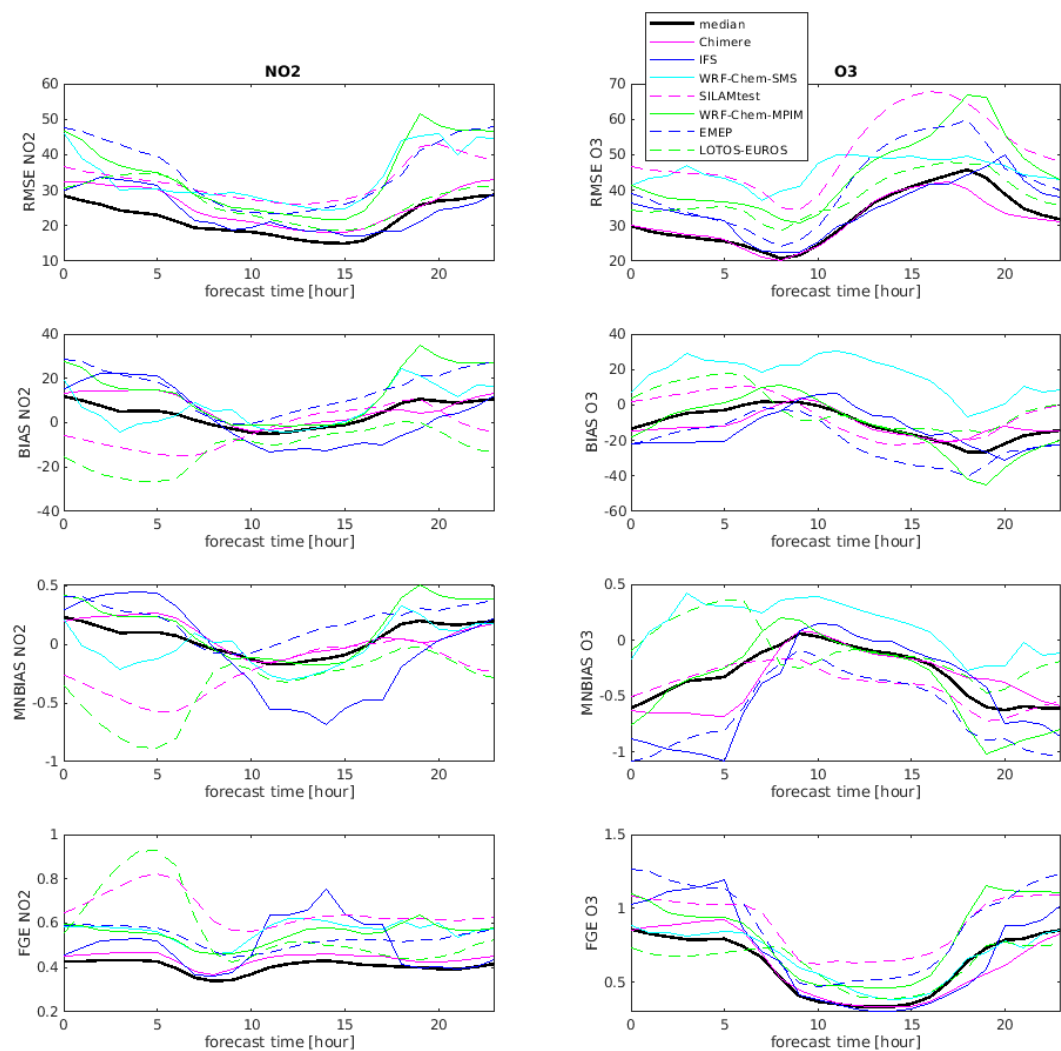

936  
 937 Figure 6: RMSE, BIAS, MNBIAS and FGE of  $\text{NO}_2$  and  $\text{O}_3$  over the forecasting time (time of the  
 938 day).

939  
 940  
 941  
 942  
 943  
 944  
 945  
 946  
 947  
 948  
 949  
 950  
 951  
 952  
 953  
 954  
 955

956  
957

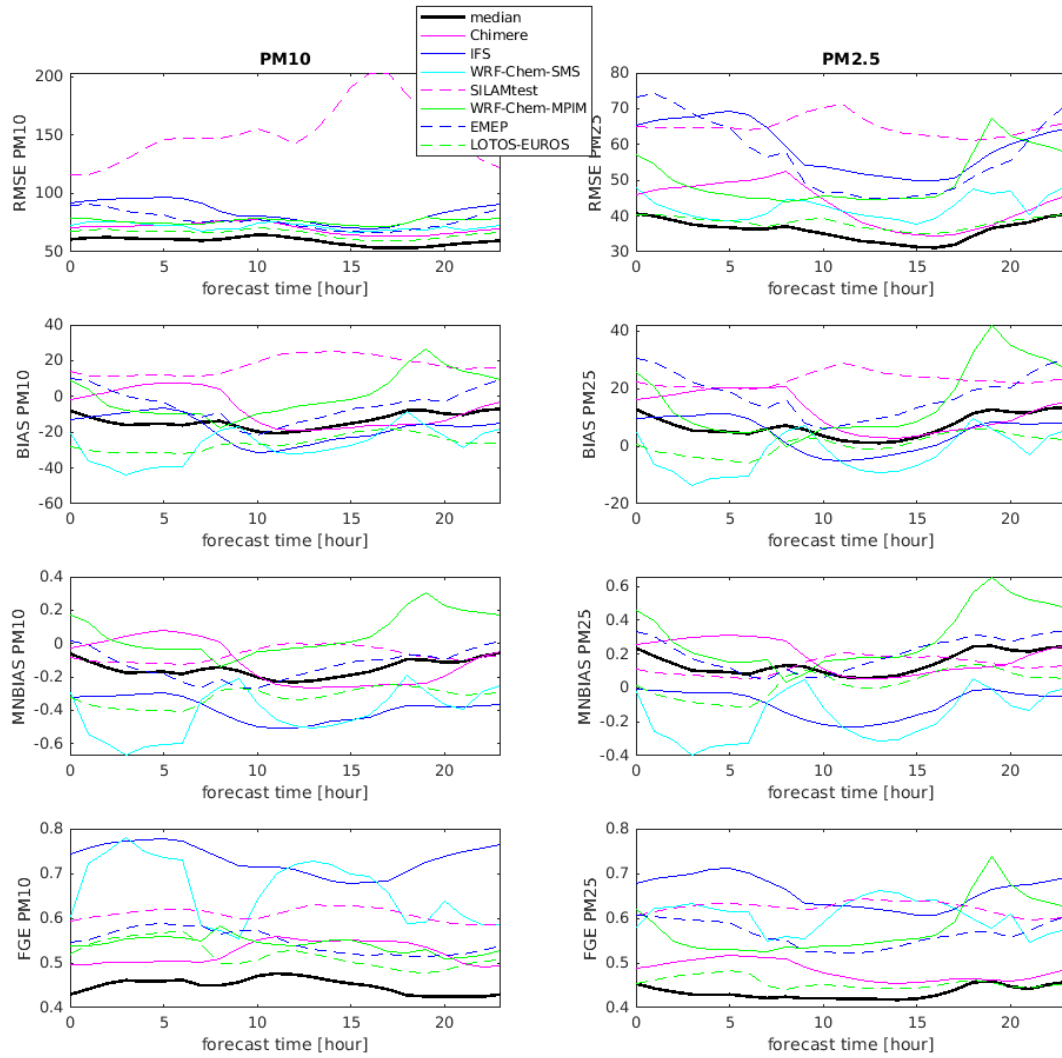

958  
959 *Figure 7: RMSE, BIAS, MNBIAS and FGE of PM10 and PM2.5 over the forecasting time (time of*  
960 *the day).*

961  
962  
963  
964  
965  
966  
967  
968  
969  
970  
971  
972  
973  
974  
975



976  
977  
978  
979  
980  
981  
982  
983  
984  
985  
986  
987  
988  
989  
990  
991  
992  
993  
994  
995  
996  
997  
998  
999  
1000  
1001

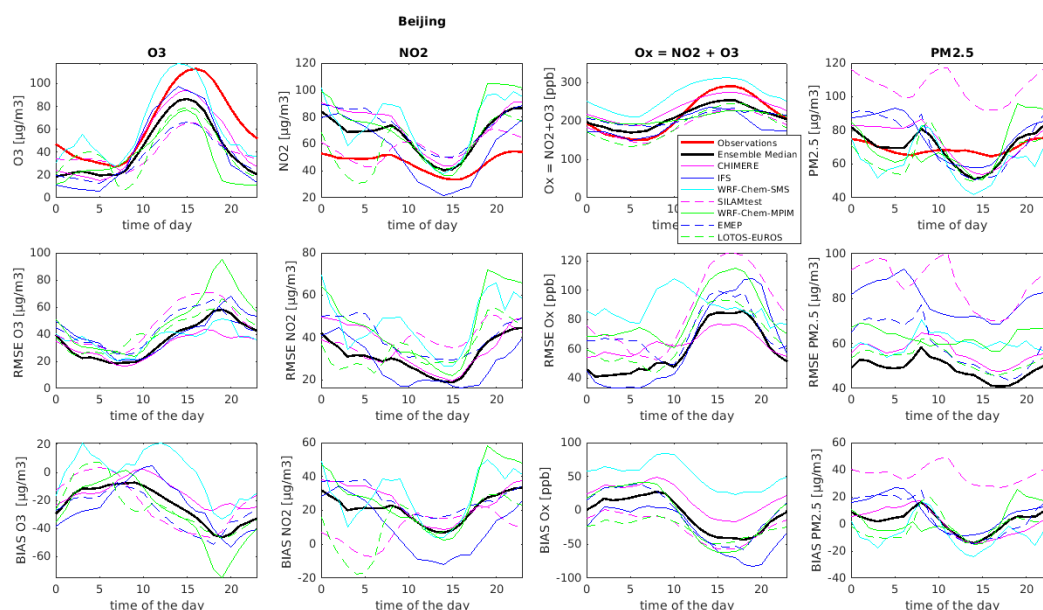

1003  
1004  
1005  
1006  
1007  
1008

Figure 8: Diurnal variations of the concentrations and of the RMSE and BIAS of O<sub>3</sub>, NO<sub>2</sub>, O<sub>x</sub> and PM<sub>2.5</sub> for Beijing for the whole time period (April 2016 – June 2017).

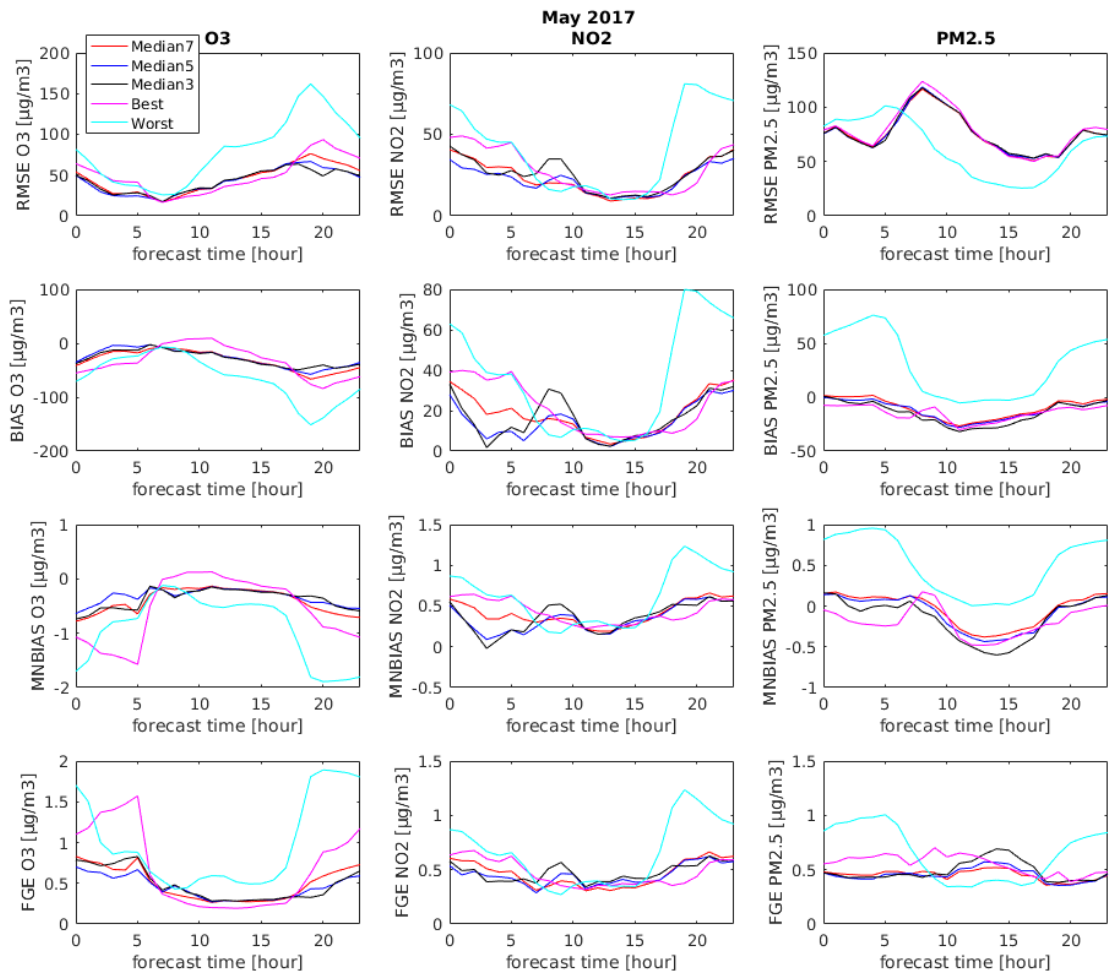

1010  
1011  
1012  
1013  
1014  
1015  
1016  
1017  
1018  
1019  
1020  
1021  
1022  
1023  
1024  
1025  
1026  
1027  
1028  
1029

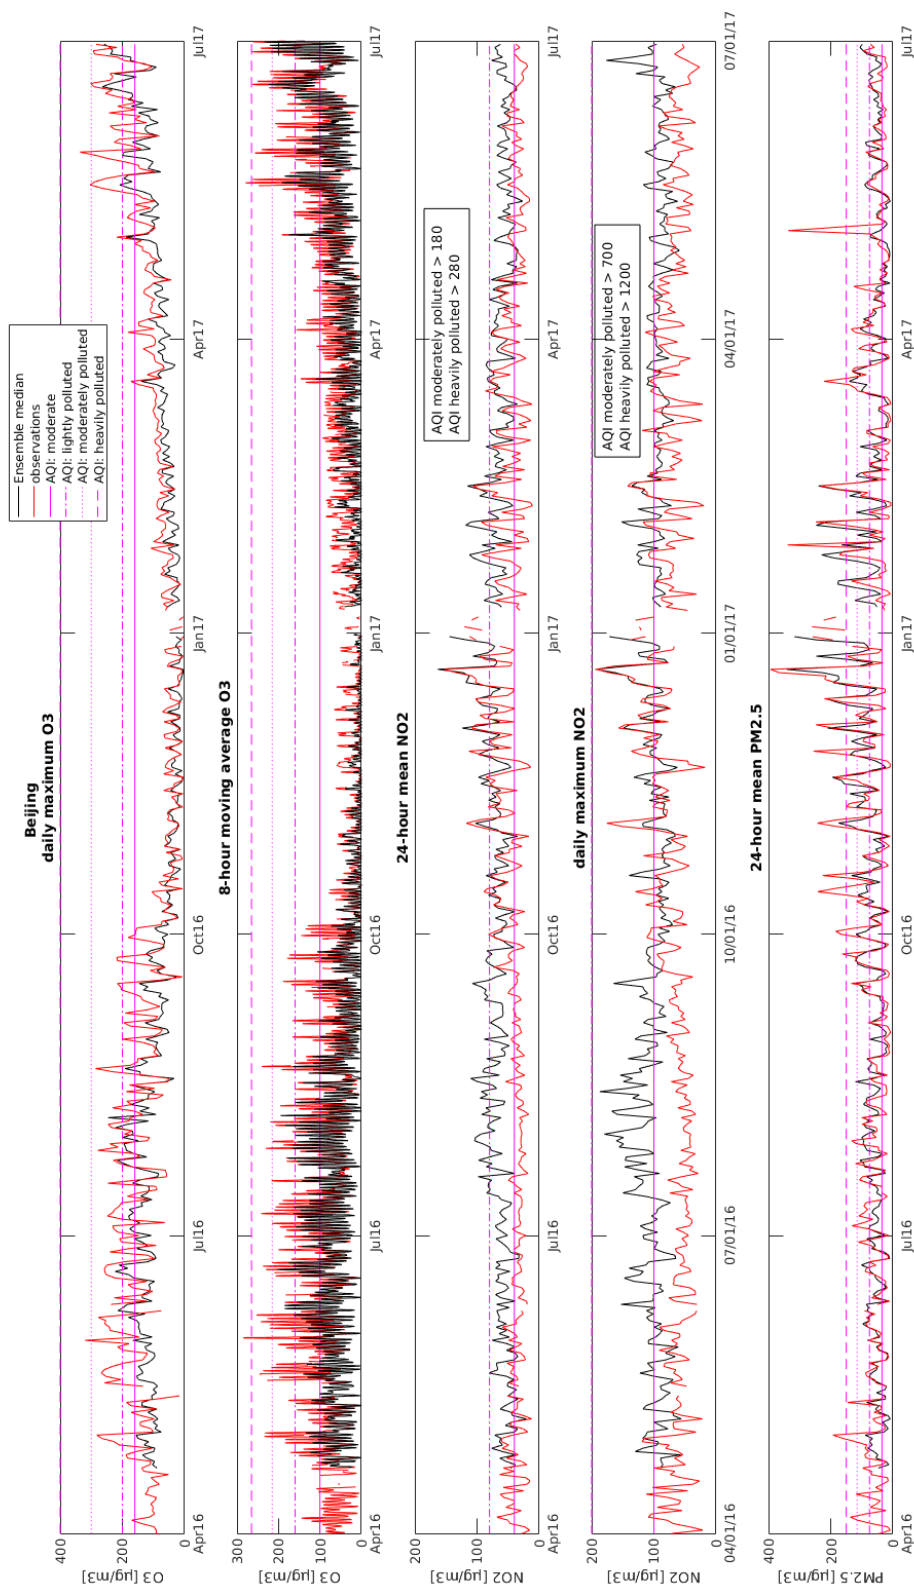

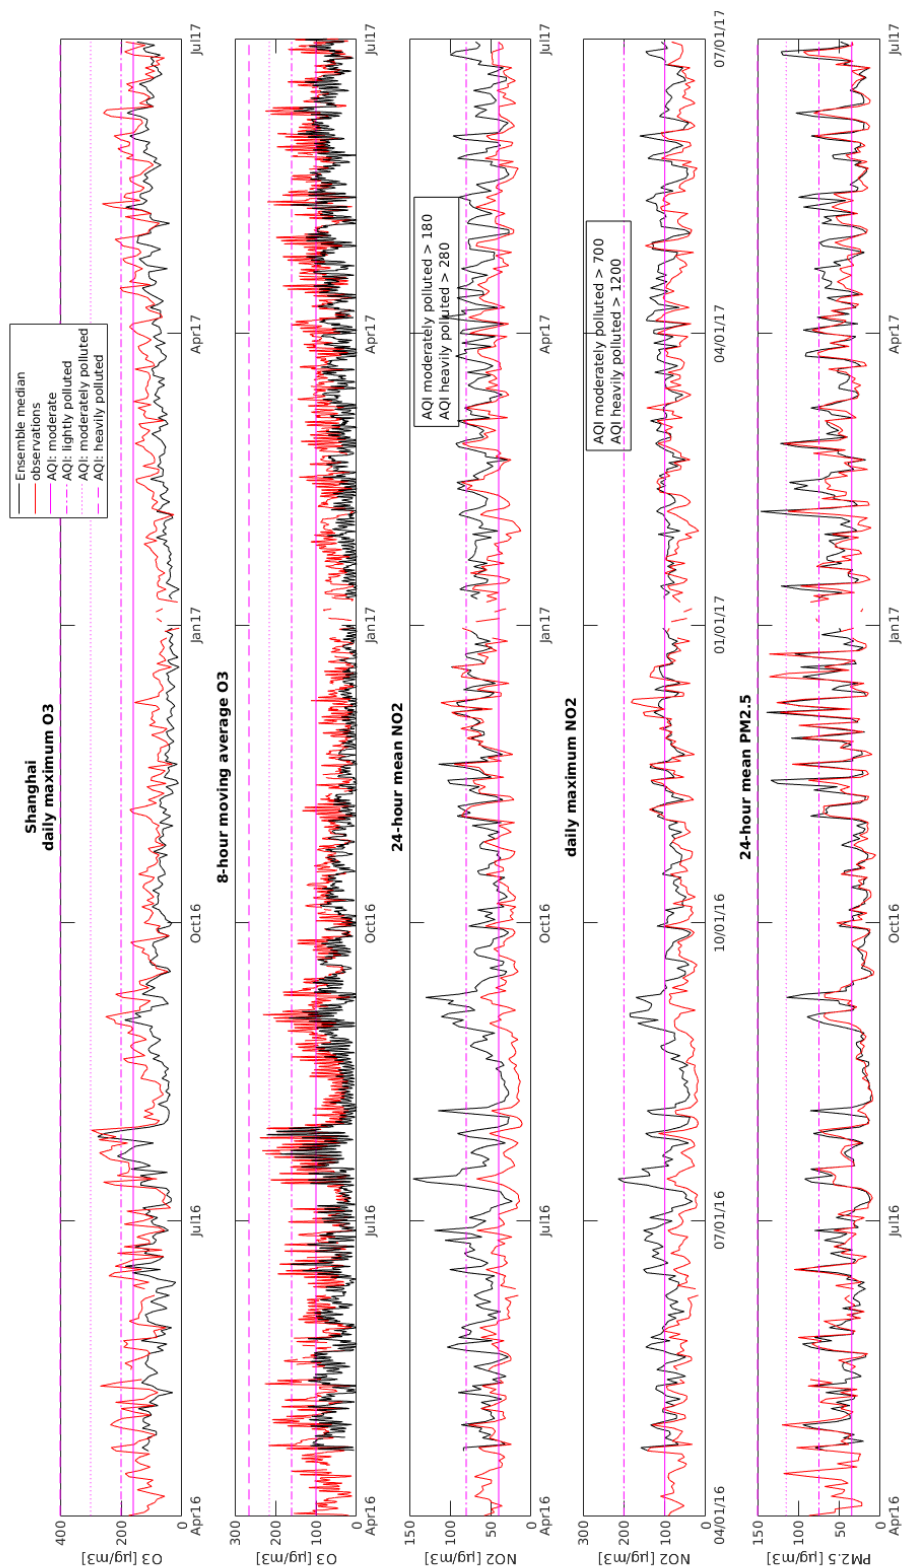

Figure 10:  
Timeseries of  
daily maximum  
 $O_3$ , 8-hour  
moving average  
 $O_3$ , 24-hour mean  
 $NO_2$ , daily  
maximum  $NO_2$   
and 24-hour  
mean  $PM_{2.5}$  for  
Beijing from  
April 2016 until  
June 2017.

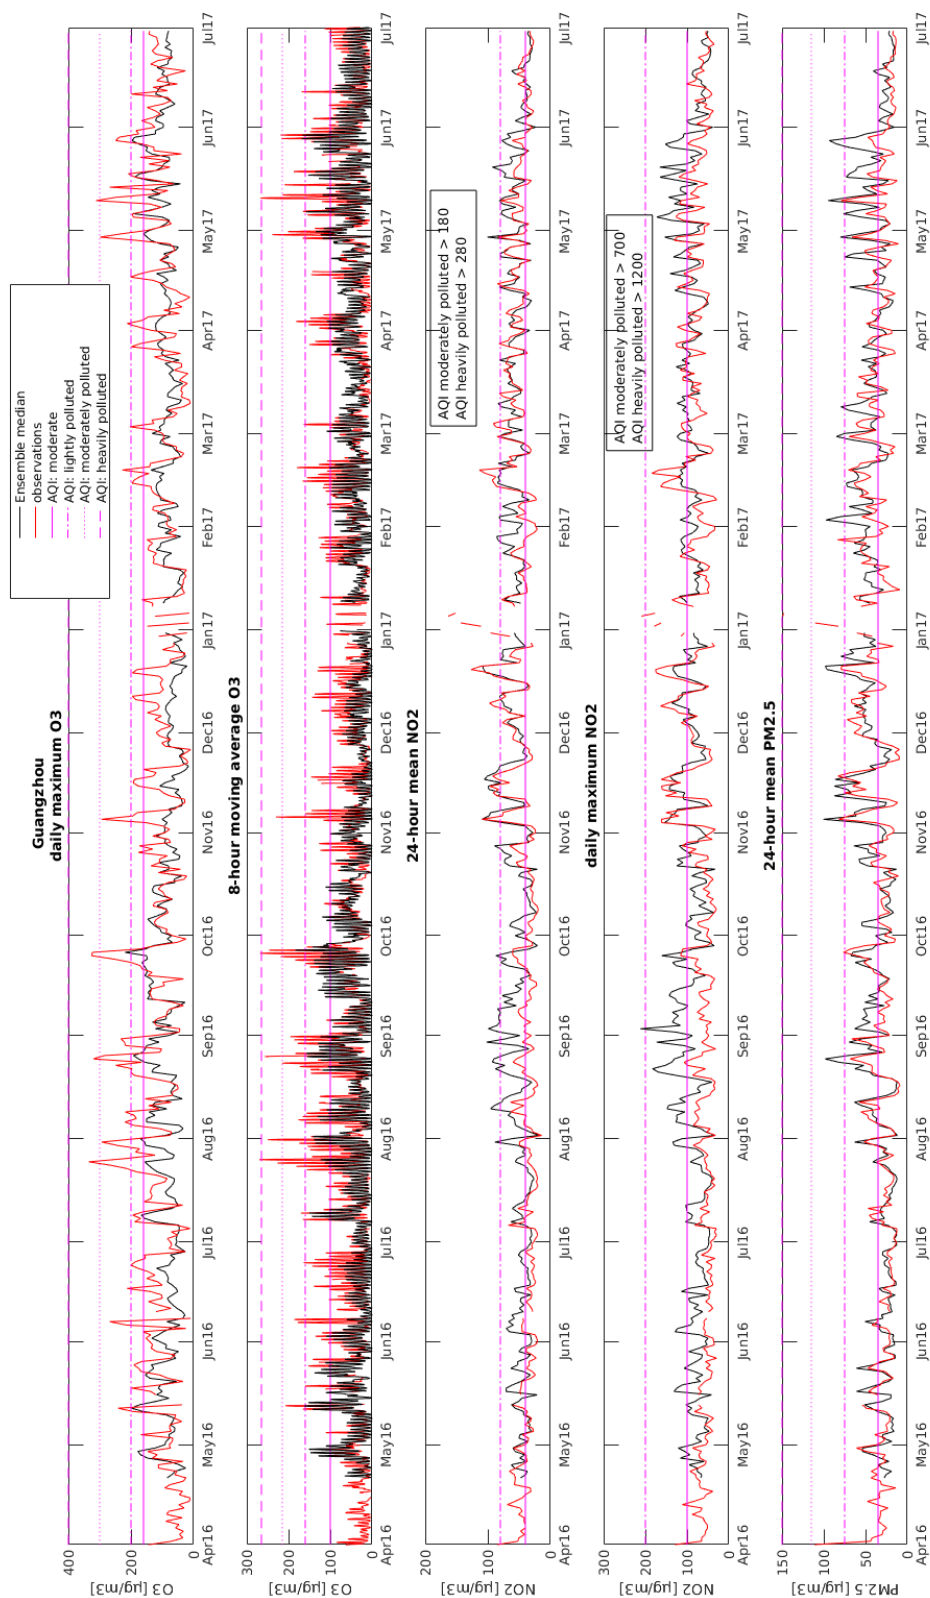

Figure 11:  
Timeseries of  
daily maximum  
 $O_3$ , 8-hour  
moving average  
 $O_3$ , 24-hour mean  
 $NO_2$ , daily  
maximum  $NO_2$   
and 24-hour  
mean  $PM_{2.5}$  for  
Shanghai from  
April 2016 until  
June 2017.

1180  
1181  
1182  
1183  
1184  
1185  
1186  
1187  
1188  
1189  
1190  
1191  
1192  
1193  
1194  
1195  
1196  
1197  
1198  
1199  
1200  
1201  
1202  
1203  
1204  
1205  
1206  
1207  
1208  
1209  
1210

1211 *Figure 12: Calculated (ensemble median) and observed timeseries of daily maximum O<sub>3</sub>, 8-hour*  
1212 *moving average O<sub>3</sub>, 24-hour mean NO<sub>2</sub>, daily maximum NO<sub>2</sub> and 24-hour mean PM<sub>2.5</sub> for*  
1213 *Guangzhou from April 2016 until June 2017.*  
1214

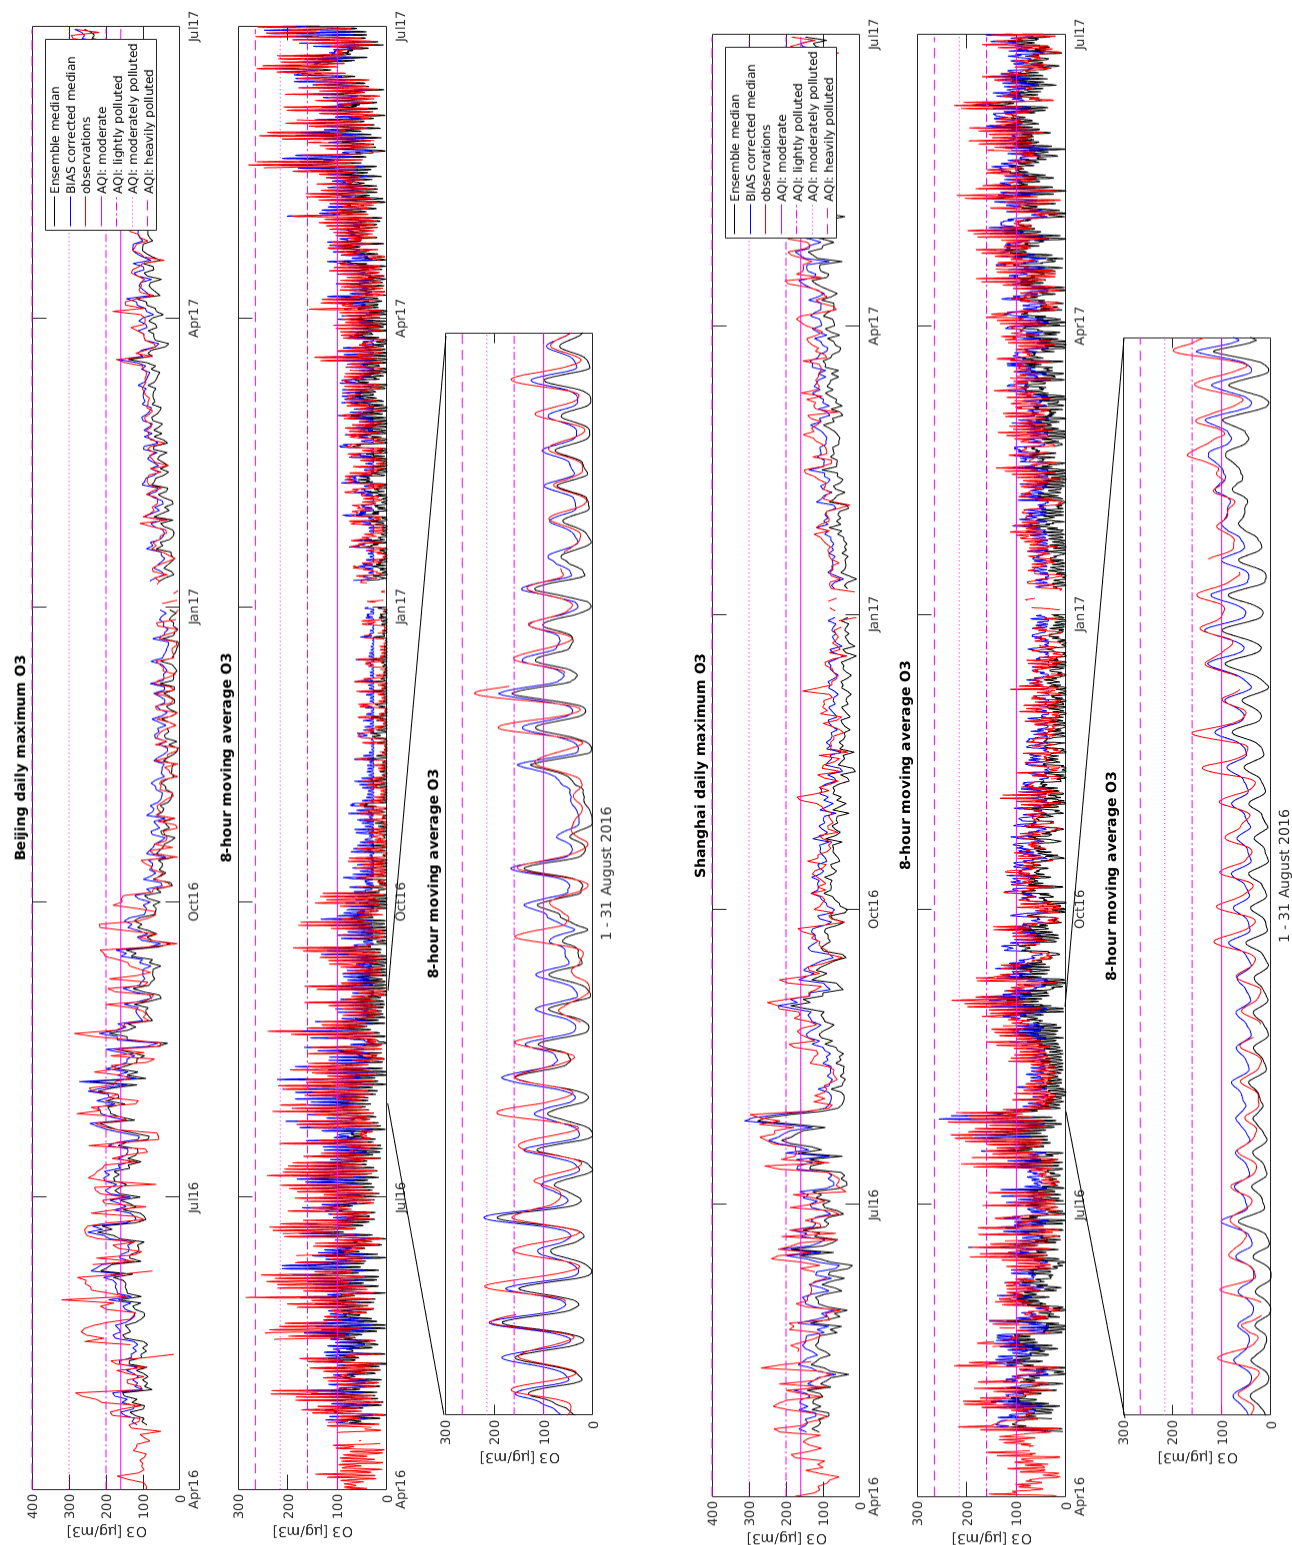

Figure 13 a and b: Timeseries of calculated (ensemble median) and observed daily maximum and 8-hour moving average  $O_3$  for Beijing and Shanghai together with the bias corrected calculated timeseries.

1218  
1219



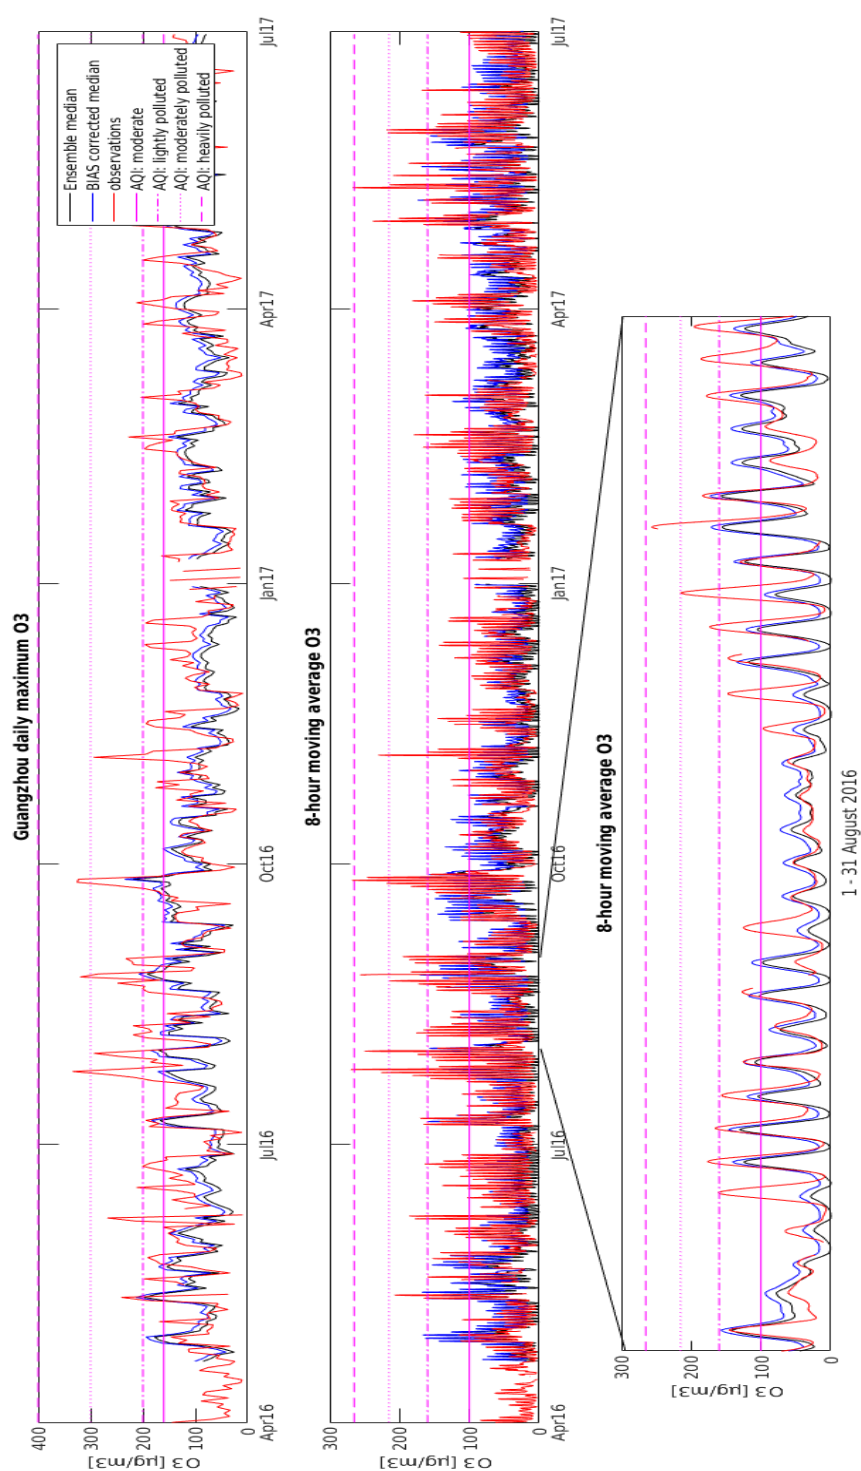

Figure 13 c: Timeseries of calculated (ensemble median) and observed daily maximum and 8-hour moving average  $O_3$  for Guangzhou together with the bias corrected calculated timeseries.

1270

## 1271References

1272

1273

1274Akimoto, H., Global air quality and pollution, *Science*, 302(5651):1716-9, 2003.

1275

1276Ashmore, M. R. (2005), Assessing the future global impacts of ozone on vegetation. *Plant, Cell & Environment*, 28: 949–964. doi:10.1111/j.1365-3040.2005.01341.

1278

1279Bessagnet, B., Pirovano, G., Mircea, M., Cuvelier, C., Aulinger, A., Calori, G., Ciarelli, G.,  
1280Manders, A., Stern, R., Tsyro, S., García Vivanco, M., Thunis, P., Pay, M.-T., Colette, A.,  
1281Couvidat, F., Meleux, F., Rouil, L., Ung, A., Aksoyoglu, S., Baldasano, J. M., Bieser, J., Briganti,  
1282G., Cappelletti, A., D’Isidoro, M., Finardi, S., Kranenburg, R., Silibello, C., Carnevale, C., Aas, W.,  
1283Dupont, J.-C., Fagerli, H., Gonzalez, L., Menut, L., Prévôt, A. S. H., Roberts, P., and White, L.,  
1284Presentation of the EU-RODELTA III intercomparison exercise – evaluation of the chemistry  
1285transport models’ performance on criteria pollutants and joint analysis with meteorology, *Atmos.*  
1286*Chem. Phys.*, 16, 12667-12701, <https://doi.org/10.5194/acp-16-12667-2016>, 2016.

1287

1288Boynard, A., Clerbaux, C., Clarisse, L., Safieddine, S., Pommier, M., Van Damme, M., Bauduin, S.,  
1289Oudot, C., Hadji-Lazaro, J., Hurtmans, D., Coheur, P.-F., First simultaneous space measurements of  
1290atmospheric pollutants in the boundary layer from IASI: A case study in the North China Plain,  
1291*Geophys. Res. Lett.*, 41, 645–651, doi:10.1002/2013GL058333, 2014.

1292

1293Brasseur, G.P., Xie, Y., Petersen, A.K., Bouarar, I., Flemming, J., Gauss, M., Jiang, F., Kouznetsov,  
1294R., Kranenburg, R., Mijling, B., Peuch, V.-H., Pommier, M., Segers, A., Sofiev, M., Timmermans,  
1295R., Van der A, R., Walters, S., Xu, J., Zhou, G., Ensemble Forecasts of Air Quality in Eastern  
1296China, Part 1. Model Description and Implementation, submitted to *Geosci. Model Dev*, 2018.

1297

1298Brasseur, G. P. and D. J. Jacob, *Modeling of Atmospheric Chemistry*, Cambridge University Press,  
12992017.

1300

1301Brasseur, G. P., J. Orlando, and G. Tyndall, *Atmospheric Chemistry and Global Change*, Oxford  
1302University Press, New York, 1999.

1303

1304Fei, Liu, Beirle, S., Zhang, Q., Van der A, R., Zheng, B., Tong, D., He, K., NO<sub>x</sub> emission trends  
1305over Chinese cities estimated from OMI observations during 2005 to 2015, *Atmos. Chem. Phys.*, 17,  
13069261–9275, 2017, <https://doi.org/10.5194/acp-17-9261-2017>, 2017.

1307

1308Fowler, D, Amann, M, Anderson, F, Ashmore, M, Cox, P, Depledge, M, Derwent, D, Grennfelt, P,  
1309Hewitt, N, Hov, O, Jenkin, M, Kelly, F, Liss, PS, Pilling, M, Pyle, J, Slingo, J and Stevenson, D  
1310(2008) *Ground-level ozone in the 21st century: Future trends, impacts and policy implications*.  
1311Royal Society Science Policy Report, 15 (08).

1312

1313Galmarini, S., Kioutsioukis, I., and Solazzo, E.: E pluribus unum\*: ensemble air quality predictions,  
1314*Atmos. Chem. Phys.*, 13, 7153–7182, doi:10.5194/acp-13-7153-2013, 2013.

1315

1316Guo, S., Hu, M., Zamora, M. L., Peng, J., Shang, D., Zheng, J., Du, Z., Wu, Z., Shao, M., Zeng, L.,  
1317Molina, M. J. and R. Zhang, Elucidating severe urban haze formation in China, *Proc. Natl. Acad.*  
1318*Sci. USA*, 111(49): 17373–17378., 2014.

1319

1320Hamra, G. B., Laden, F., Cohen, A. J., Raaschou-Nielsen, O., Brauer, M., and D. Loomis, Lung  
1321Cancer and Exposure to Nitrogen Dioxide and Traffic: A Systematic Review and Meta-Analysis,  
1322*Environ Health Perspect*, 123 | 11, DOI:10.1289/ehp.1408882, 2015.

1323

1324Huang, K., Zhuang, G., Wang, Q., Fu, J. S., Lin, Y., Liu, T., Han, L., and Deng, C.: Extreme haze  
1325pollution in Beijing during January 2013: chemical characteristics, formation mechanism and role  
1326of fog processing, *Atmos. Chem. Phys. Discuss.*, 14, 7517-7556, doi:10.5194/acpd-14-7517-2014,  
13272014.

1328

1329Huang, R.-J., Y. Zhang, et al. (2014). High secondary aerosol contribution to particulate pollution  
1330during haze events in China. *Nature* 514(7521): 218-222.

1331

1332Kampa, M., and Castanas, E., Human health effects of air pollution, *Environmental Pollution*,  
1333151:362–367, DOI: 10.1016/j.envpol.2007.06.012, 2008.

1334

1335Leisner, C. P. and Ainsworth, E. A.: Quantifying the effects of ozone on plant reproductive growth  
1336and development, *Global Change Biol.*, 18, 606–616, 2012.

1337

1338Marécal, V., Peuch, V.-H., Andersson, C., Andersson, S., Arteta, J., Beekmann, M., Benedictow, A.,  
1339Bergstroem, R., Bessagnet, B., Cansado, A., Cheroux, F., Colette, A., Coman, A., Curier, R.L.,  
1340Denier van der Gon, H.A.C., Drouin, A., Elbern, H., Emili, E., Engelen, R.J., Eskes, H.J., Foret, G.,  
1341Frieze, E., Gauss, M., Giannaros, C., Guth, J., Joly, M., Jaumouille, E., Josse, B., Kadygrov, N.,  
1342Kaiser, J.W., Krajsek, K., Kuenen, J., Kumar, U., Liora, N., Lopez, E., Malherbe, L., Martinez, I.,  
1343Melas, D., Meleux, F., Menut, L., Moinat, P., Morales, T., Parmentier, J., Piacentini, A., Plu,  
1344M., Poupkou, A., Queguiner, S., Robertson, L., Rouil, L., Schaap, M., Segers, A., Sofiev, M.,  
1345Thomas, M., Timmermans, R., Valdebenito, A., van Velthoven, P., van Versendaal, R., Vira, J.,  
1346Ung, A., 2015. A regional air quality forecasting system over Europe: the MACC-II daily ensemble  
1347production. *Geosci. Model Dev.* 8, 2777 e 2813. <http://dx.doi.org/10.5194/gmd-8-2777-2015>.

1348

1349Mizzi, A.P., A.F. Arellano, D.P. Edwards, J.L. Anderson, and G.G. Pfister: Assimilating compact  
1350phase space retrievals of atmospheric composition with WRF-Chem/DART: a regional chemical  
1351transport/ensemble Kalman filter data assimilation system, *Geosci. Model Dev.*, 9, 965-978, 2016.

1352

1353Sinha, B., Singh Sangwan, K., Maurya, Y., Kumar, V., Sarkar, C., Chandra, B. P., and Sinha, V.:  
1354Assessment of crop yield losses in Punjab and Haryana using 2 years of continuous in situ ozone  
1355measurements, *Atmos. Chem. Phys.*, 15, 9555-9576, doi:10.5194/acp-15-9555-2015, 2015.

1356

1357Sitch, S., Cox, P.M., Collins, W.J., Huntingford, C., Indirect radiative forcing of climate change  
1358through ozone effects on the land-carbon sink. *Nature*. 448: 791-794, 2007.

1359

1360Sun, L., Xue, L., Wang, T., Gao, J., Ding, A., Cooper, O. R., Lin, M., Xu, P., Wang, Z., Wang, X.,  
1361Wen, L., Zhu, Y., Chen, T., Yang, L., Wang, Y., Chen, J., and Wang, W.: Significant increase of  
1362summertime ozone at Mount Tai in Central Eastern China, *Atmos. Chem. Phys.*, 16, 10637-10650,  
1363<https://doi.org/10.5194/acp-16-10637-2016>, 2016.

1364

1365Wang, Y., Yao, L., Wang, L., Ji, D., Tang, G., Zhang, J., Sun, Y., Hu, B., Xin, J., Mechanism for  
1366the formation of the January 2013 heavy haze pollution episode over central and eastern China, *Sci.*  
1367*China Earth Sci.*, 57: 14. doi:10.1007/s11430-013-4773-4, 2014.

1368

1369WHO, <http://www.who.int/airpollution/data/cities/en/>, 2018.

1370

1371Wu, Q., Wang, Z., Chen, H., Zhou, W., Wenig, M., An evaluation of air quality modeling over the  
1372Pearl River Delta during November 2006, *Meteorol. Atmos. Phys.*, *116*: 113. doi:10.1007/s00703-  
1373011-0179-z, 2012.

1374

1375Xu, J., Zhang, Y., Fu, J.S., Zheng, S., Wang, W., Process analysis of typical summertime ozone  
1376episodes over the Beijing area, *Science of The Total Environment*, *399* (1–3), 147-157,  
1377<http://dx.doi.org/10.1016/j.scitotenv.2008.02.013>, 2008.

1378

1379Zhao, X. J., Zhao, P. S., Xu, J., Meng,, W., Pu, W. W., Dong, F., He, D., and Shi, Q. F.: Analysis of  
1380a winter regional haze event and its formation mechanism in the North China Plain, *Atmos. Chem.*  
1381*Phys.*, *13*, 5685-5696, doi:10.5194/acp-13-5685-2013, 2013.

1382

1383Zhang, B., Wang, Y., and Hao, J., Simulating aerosol–radiation–cloud feedbacks on meteorology  
1384and air quality over eastern China under severe haze conditions in winter, *Atmos. Chem. Phys.*, *15*,  
13852387-2404, doi:10.5194/acp-15-2387-2015, 2015.
